# Supplementary material for: Influence of heterochirality on the structure, dynamics, biological properties of cyclic(PFPF) tetrapeptides obtained by solvent-free ball mill mechanosynthesis
Source: PubMed Central journal article supplement (PMC11150477; doi:10.1038/s41598-024-63552-4), 2024-06-04
Supplement: 41598_2024_63552_MOESM1_ESM.pdf [file 41598_2024_63552_MOESM1_ESM.pdf]

## Table of Contents

|                                                                                                                                                                                                                                                                                                                |           |
|----------------------------------------------------------------------------------------------------------------------------------------------------------------------------------------------------------------------------------------------------------------------------------------------------------------|-----------|
| <b>1. Mechanosynthesis and identification of c-PFPF A and B</b> .....                                                                                                                                                                                                                                          | <b>2</b>  |
| Figure S1. UPLC-ESI(+)-MS chromatograms of Pro-Phe-Pro-Phe-HCl with TBTU and DIPEA after 3h of milling and washed with water. a) total ion chromatogram (TIC), b) extracted ion chromatogram (XIC) of monoisotopic peak of cyclic tetrapeptide cPro-Phe-Pro-Phe ( $m/z$ 489.2502). .....                       | 2         |
| Figure S2. Flash chromatogram of the crude mixture after the reaction of ball grinding-for 3 hours of Pro-Phe-Pro-Phe-HCl with TBTU and DIPEA and washing with water. ....                                                                                                                                     | 2         |
| Figure S3. HPLC chromatograms of separated cyclic tetrapeptides c(Pro-Phe-Pro-Phe). a) c(Pro-Phe-Pro-Phe) and b) c(Pro-Phe-Pro-D-Phe). ....                                                                                                                                                                    | 3         |
| Figure S4. Total ion chromatograms (TIC) and ESI(+)-MS spectra of separated cyclic tetrapeptides c(Pro-Phe-Pro-Phe). a) c(Pro-Phe-Pro-Phe) and b) c(Pro-Phe-Pro-D-Phe). ....                                                                                                                                   | 3         |
| <b>2. Structural data from scXRD</b> .....                                                                                                                                                                                                                                                                     | <b>3</b>  |
| Table S1: Fractional Atomic Coordinates ( $\times 10^4$ ) and Equivalent Isotropic Displacement Parameters ( $\text{\AA}^2 \times 10^3$ ) for <b>c(Pro-Phe-Pro-Phe)</b> and <b>c(Pro-Phe-Pro-D-Phe)</b> , respectively. $U_{eq}$ is defined as 1/3 of the trace of the orthogonalized $U_{ij}$ . ....          | 3         |
| Table S2: Anisotropic Displacement Parameters ( $\times 10^4$ ) for <b>c(Pro-Phe-Pro-Phe)</b> and <b>c(Pro-Phe-Pro-D-Phe)</b> , respectively. The anisotropic displacement factor exponent takes the form: $-2\pi^2[h^2a^{*2} \times U_{11} + \dots + 2hka^* \times b^* \times U_{12}]$ .....                  | 4         |
| Table S3: Bond Lengths in $\text{\AA}$ for <b>c(Pro-Phe-Pro-Phe)</b> and <b>c(Pro-Phe-Pro-D-Phe)</b> , respectively. ....                                                                                                                                                                                      | 5         |
| Table S4: Bond Angles in for <b>c(Pro-Phe-Pro-Phe)</b> and <b>c(Pro-Phe-Pro-D-Phe)</b> , respectively. ....                                                                                                                                                                                                    | 5         |
| Table S5: Torsion Angles in for <b>c(Pro-Phe-Pro-Phe)</b> and <b>c(Pro-Phe-Pro-D-Phe)</b> , respectively. ....                                                                                                                                                                                                 | 6         |
| Table S6: Hydrogen Fractional Atomic Coordinates ( $\times 10^4$ ) and Equivalent Isotropic Displacement Parameters ( $\text{\AA}^2 \times 10^3$ ) for <b>c(Pro-Phe-Pro-Phe)</b> and <b>c(Pro-Phe-Pro-D-Phe)</b> , respectively. $U_{eq}$ is defined as 1/3 of the trace of the orthogonalized $U_{ij}$ . .... | 8         |
| Figure S5. A crystal packing diagram of (a) c(Pro-Phe-Pro-Phe) (sample A) and (b) c(Pro-Phe-Pro-D-Phe) (sample B). The views along the $b$ -axis are shown above, while the views along the $a$ -axis are shown below. ....                                                                                    | 9         |
| <b>3. Theoretical Calculations and ECD Spectroscopy</b> .....                                                                                                                                                                                                                                                  | <b>9</b>  |
| Table S7. Relative conformers energies with population at 298 K for sample <b>A</b> after DFT calculations at the B3LYP/6-311+G(d,p)/PCM(H <sub>2</sub> O) level of theory. ....                                                                                                                               | 9         |
| Table S8. Relative conformers energies with population at 298 K for sample <b>B</b> after DFT calculations at the B3LYP/6-311+G(d,p)/PCM(H <sub>2</sub> O) level of theory. ....                                                                                                                               | 9         |
| <b>4. Molecular dynamics on the base of 1D and 2D NMR spectroscopy</b> .....                                                                                                                                                                                                                                   | <b>10</b> |
| Table S9. cPFPF sample heterochiral B. ....                                                                                                                                                                                                                                                                    | 10        |
| Figure S7. NMR TOCSY <sup>1</sup> H- <sup>1</sup> H spectrum of cPFPF-B in DMSO-d <sub>6</sub> (Heterochiral). ....                                                                                                                                                                                            | 11        |
| Figure S8. NMR spectra HSQC <sup>1</sup> H- <sup>15</sup> N (a) and HSQC <sup>1</sup> H- <sup>13</sup> C (b) of cPFPF-B in CD <sub>3</sub> CN (Heterochiral). ....                                                                                                                                             | 11        |
| Figure S10. NMR NOESY <sup>1</sup> H- <sup>1</sup> H spectrum of cPFPF-B, CD <sub>3</sub> CN (Heterochiral). ....                                                                                                                                                                                              | 13        |
| Table S10. NMR chemical shifts of cPFPF sample homochiral A. ....                                                                                                                                                                                                                                              | 13        |
| Figure S11-14. NMR HSQC <sup>1</sup> H- <sup>15</sup> N (a) and HSQC <sup>1</sup> H- <sup>13</sup> C (b) spectra of cPFPF-A, CD <sub>3</sub> CN (Homochiral). Prefix S means form of peptide A with 2-fold symmetry and prefix U means unsymmetrical form of A. ....                                           | 14        |
| Figure 15. 600 MHz <sup>1</sup> H NMR spectra of N-H region of sample A and sample B dissolved in chloroform-d. ....                                                                                                                                                                                           | 16        |
| Figure S16. Crystal structure of histone deacetylase 8 in complex with trapoxin A. ....                                                                                                                                                                                                                        | 17        |

## 1. Mechanosynthesis and identification of *c*-PFPF A and B

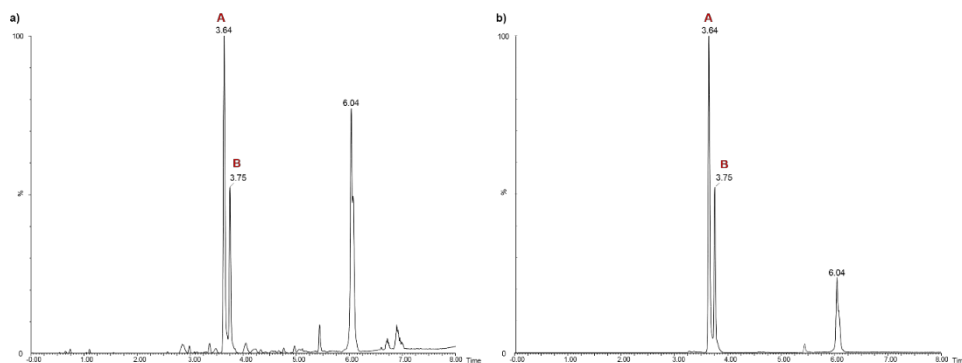

**Figure S1.** UPLC-ESI(+)-MS chromatograms of Pro-Phe-Pro-Phe-HCl with TBTU and DIPEA after 3h of milling and washed with water. a) total ion chromatogram (TIC), b) extracted ion chromatogram (XIC) of monoisotopic peak of cyclic tetrapeptide cPro-Phe-Pro-Phe ( $m/z$  489.2502).

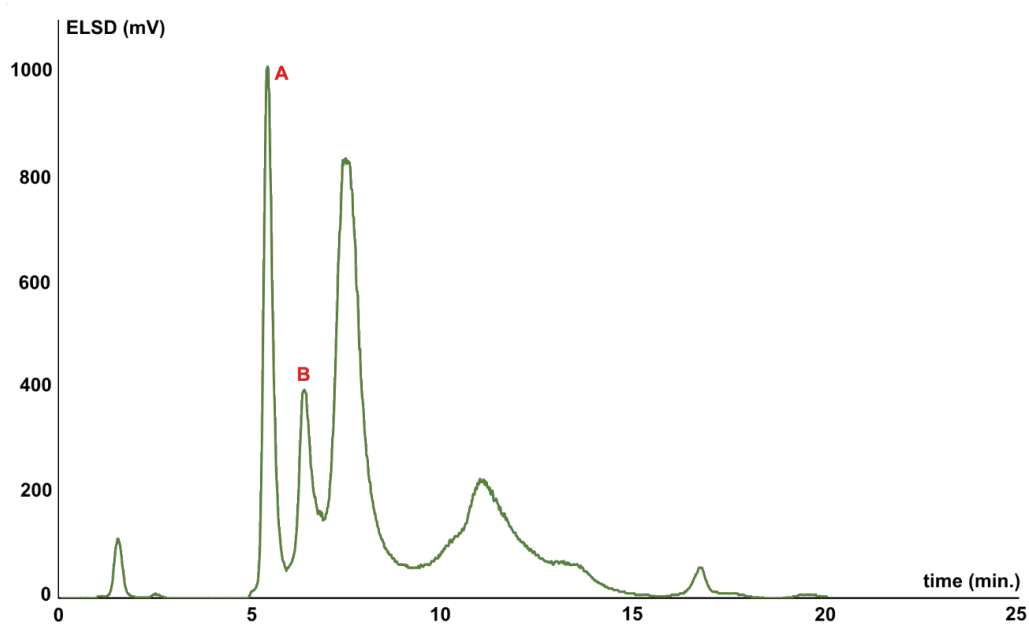

**Figure S2.** Flash chromatogram of the crude mixture after the reaction of ball grinding-for 3 hours of Pro-Phe-Pro-Phe-HCl with TBTU and DIPEA and washing with water.

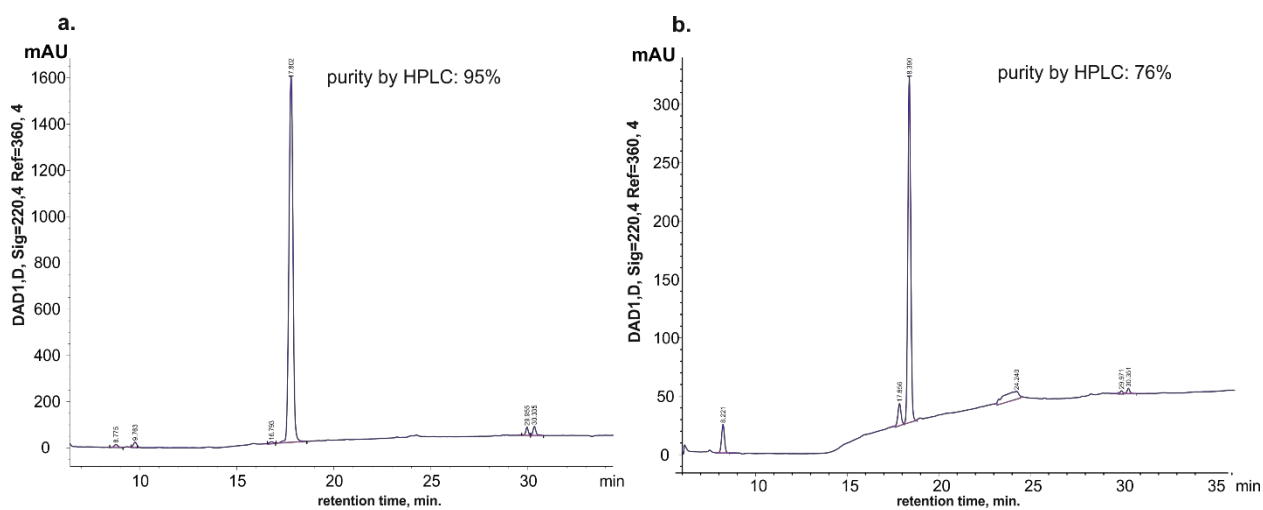

**Figure S3.** HPLC chromatograms of separated cyclic tetrapeptides c(Pro-Phe-Pro-Phe). a) c(Pro-Phe-Pro-Phe) and b) c(Pro-Phe-Pro-D-Phe).

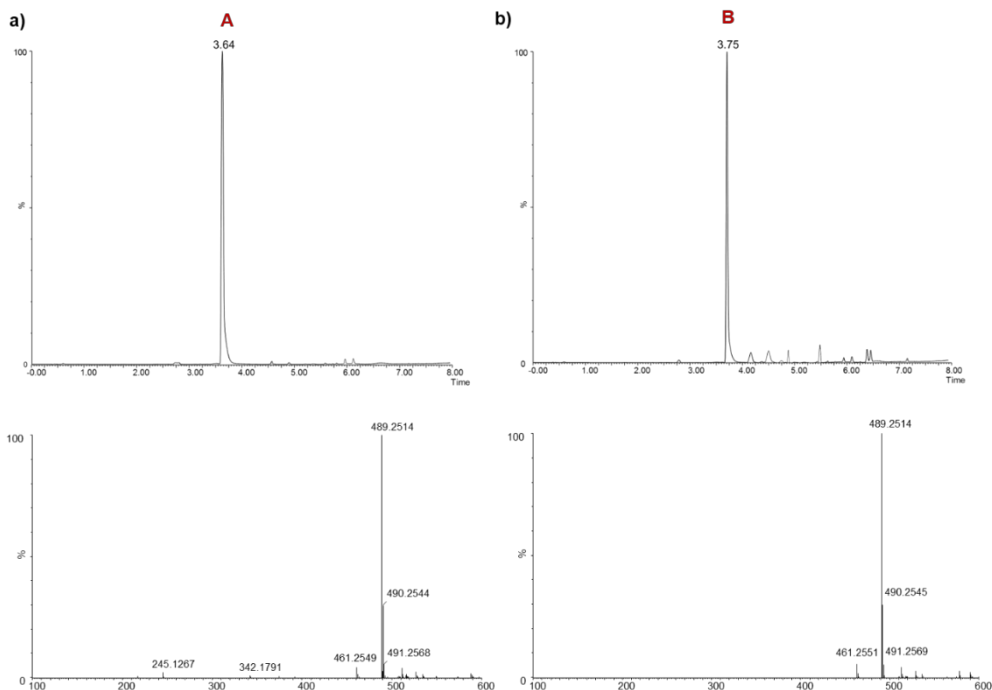

**Figure S4.** Total ion chromatograms (TIC) and ESI(+)-MS spectra of separated cyclic tetrapeptides c(Pro-Phe-Pro-Phe). a) c(Pro-Phe-Pro-Phe) and b) c(Pro-Phe-Pro-D-Phe).

## 2. Structural data from scXRD

**Table S1:** Fractional Atomic Coordinates ( $\times 10^4$ ) and Equivalent Isotropic Displacement Parameters ( $\text{\AA}^2 \times 10^3$ ) for **c(Pro-Phe-Pro-Phe)** and **c(Pro-Phe-Pro-D-Phe)**, respectively.  $U_{eq}$  is defined as 1/3 of the trace of the orthogonalized  $U_{ij}$ .

| c(Pro-Phe-Pro-Phe) |             |         |            |          | c(Pro-Phe-Pro-D-Phe) |            |         |            |          |
|--------------------|-------------|---------|------------|----------|----------------------|------------|---------|------------|----------|
| Atom               | x           | y       | z          | $U_{eq}$ | Atom                 | x          | y       | z          | $U_{eq}$ |
| <b>N1</b>          | 5582.2(13)  | 6376(4) | 1285.4(9)  | 14.8(4)  | <b>N1</b>            | 4878.3(18) | 5951(5) | 3761.4(12) | 18.7(5)  |
| <b>C2</b>          | 6058.1(15)  | 4203(5) | 1751.7(11) | 14.0(4)  | <b>C2</b>            | 4331(2)    | 3750(6) | 3299.4(14) | 19.0(6)  |
| <b>C3</b>          | 6101.0(15)  | 4276(5) | 2630.1(11) | 14.3(4)  | <b>C3</b>            | 4070(2)    | 3840(6) | 2432.4(15) | 18.1(6)  |
| <b>O4</b>          | 6176.9(12)  | 2236(3) | 2974.3(9)  | 19.5(4)  | <b>O4</b>            | 3937.9(16) | 1769(4) | 2103.1(11) | 23.2(5)  |
| <b>C5</b>          | 7209.2(16)  | 4174(5) | 1617.1(12) | 19.3(5)  | <b>C5</b>            | 3222(2)    | 3600(6) | 3471.6(15) | 23.5(6)  |
| <b>C6</b>          | 7407.3(17)  | 6948(5) | 1443.9(12) | 20.7(5)  | <b>C6</b>            | 3031(2)    | 6336(7) | 3683.2(16) | 25.1(7)  |
| <b>C7</b>          | 6367.4(17)  | 7734(5) | 930.5(12)  | 18.0(5)  | <b>C7</b>            | 4162(2)    | 7136(6) | 4162.3(15) | 21.7(6)  |
| <b>N8</b>          | 6098.5(13)  | 6532(4) | 2982.5(10) | 14.3(4)  | <b>N8</b>            | 3939.0(18) | 6095(5) | 2074.3(13) | 17.9(5)  |
| <b>C9</b>          | 6279.6(16)  | 6735(5) | 3831.3(11) | 15.3(5)  | <b>C9</b>            | 3527(2)    | 6262(6) | 1242.4(14) | 19.7(6)  |
| <b>C10</b>         | 5452.1(17)  | 8372(5) | 4121.9(11) | 17.2(5)  | <b>C10</b>           | 4240(2)    | 7928(6) | 895.7(15)  | 20.8(6)  |
| <b>O11</b>         | 5727.4(13)  | 9914(3) | 4648.8(9)  | 23.1(4)  | <b>O11</b>           | 3815.2(17) | 9529(4) | 410.7(11)  | 27.3(5)  |
| <b>C12</b>         | 7376.7(17)  | 7856(5) | 4166.7(12) | 20.0(5)  | <b>C12</b>           | 2357(2)    | 7305(6) | 982.2(16)  | 24.4(6)  |
| <b>C13</b>         | 8295.6(16)  | 6388(5) | 3980.5(12) | 19.3(5)  | <b>C13</b>           | 1520(2)    | 5666(6) | 1183.3(15) | 22.6(6)  |
| <b>C14</b>         | 8632.9(18)  | 4134(5) | 4362.9(12) | 23.0(5)  | <b>C14</b>           | 1089(2)    | 6393(7) | 1759.7(16) | 28.0(7)  |
| <b>C15</b>         | 8870.5(19)  | 7355(5) | 3456.1(13) | 24.2(5)  | <b>C15</b>           | 1114(2)    | 3476(7) | 774.0(16)  | 26.7(7)  |
| <b>C16</b>         | 9533(2)     | 2898(6) | 4237.1(15) | 31.7(6)  | <b>C16</b>           | 278(3)     | 4950(7) | 1917.1(19) | 34.1(8)  |
| <b>C17</b>         | 9769(2)     | 6117(6) | 3328.5(16) | 34.3(7)  | <b>C17</b>           | 295(3)     | 2043(7) | 926.7(18)  | 32.5(8)  |
| <b>C18</b>         | 10103.4(19) | 3905(7) | 3720.0(17) | 36.2(7)  | <b>C18</b>           | -124(3)    | 2785(8) | 1498(2)    | 35.1(8)  |
| <b>N19</b>         | 4418.9(14)  | 8041(4) | 3801.0(10) | 16.6(4)  | <b>N19</b>           | 5324.8(18) | 7498(5) | 1098.3(12) | 20.5(5)  |
| <b>C20</b>         | 3950.1(16)  | 5964(5) | 3299.8(12) | 15.2(5)  | <b>C20</b>           | 5953(2)    | 5589(6) | 1622.1(15) | 20.2(6)  |
| <b>C21</b>         | 3879.9(15)  | 6584(4) | 2435.1(11) | 13.7(4)  | <b>C21</b>           | 6210(2)    | 6454(6) | 2444.4(15) | 18.9(6)  |
| <b>O22</b>         | 3822.5(11)  | 8754(3) | 2181.1(8)  | 17.8(4)  | <b>O22</b>           | 6269.5(15) | 8710(4) | 2630.8(11) | 24.2(5)  |
| <b>C23</b>         | 2819.9(17)  | 5815(5) | 3464.0(12) | 19.3(5)  | <b>C23</b>           | 7034(2)    | 5463(6) | 1418.1(16) | 24.7(7)  |

| c(Pro-Phe-Pro-Phe) |            |         |            |          | c(Pro-Phe-Pro-D-Phe) |            |         |            |          |
|--------------------|------------|---------|------------|----------|----------------------|------------|---------|------------|----------|
| Atom               | x          | y       | z          | $U_{eq}$ | Atom                 | x          | y       | z          | $U_{eq}$ |
| C24                | 2586.9(17) | 8584(5) | 3636.0(12) | 21.2(5)  | C24                  | 7161(2)    | 8199(6) | 1158.9(17) | 27.4(7)  |
| C25                | 3632.2(17) | 9436(5) | 4137.8(12) | 19.0(5)  | C25                  | 5994(2)    | 8959(7) | 722.0(16)  | 24.6(6)  |
| N26                | 3867.9(14) | 4509(4) | 1983.9(10) | 14.4(4)  | N26                  | 6419.5(19) | 4536(6) | 2954.2(14) | 20.3(5)  |
| C27                | 3742.8(15) | 4729(4) | 1140.6(11) | 14.4(5)  | C27                  | 6823(2)    | 5134(7) | 3758.8(16) | 24.4(7)  |
| C28                | 4553.9(16) | 6550(5) | 907.3(11)  | 15.7(5)  | C28                  | 5968(2)    | 6237(6) | 4099.8(15) | 20.7(6)  |
| O29                | 4284.9(12) | 8087(3) | 377.8(8)   | 20.9(4)  | O29                  | 6318.5(16) | 7555(5) | 4670.1(11) | 27.1(5)  |
| C30                | 2625.3(16) | 5588(5) | 753.3(12)  | 17.5(5)  | C30                  | 7482(2)    | 2936(7) | 4207.4(16) | 27.6(7)  |
| C31                | 1758.9(16) | 3870(5) | 907.8(11)  | 17.1(5)  | C31                  | 8559(2)    | 2665(7) | 4030.5(16) | 26.7(7)  |
| C32                | 1158.5(17) | 4521(6) | 1457.5(12) | 23.4(5)  | C32                  | 8698(2)    | 800(7)  | 3542.1(18) | 31.3(7)  |
| C33                | 1508.8(17) | 1648(5) | 484.4(13)  | 20.2(5)  | C33                  | 9416(3)    | 4306(7) | 4358.8(18) | 34.6(8)  |
| C34                | 328.8(19)  | 2990(6) | 1570.7(15) | 29.6(6)  | C34                  | 9698(3)    | 522(8)  | 3399(2)    | 40.9(9)  |
| C35                | 678.1(18)  | 122(5)  | 593.6(14)  | 25.2(5)  | C35                  | 10394(3)   | 4074(9) | 4206.4(19) | 42.1(9)  |
| C36                | 86.7(18)   | 795(6)  | 1139.8(16) | 29.8(6)  | C36                  | 10551(3)   | 2196(9) | 3735(2)    | 43.8(10) |

**Table S2:** Anisotropic Displacement Parameters ( $\times 10^4$ ) for **c(Pro-Phe-Pro-Phe)** and **c(Pro-Phe-Pro-D-Phe)**, respectively. The anisotropic displacement factor exponent takes the form:  $-2\pi^2[h^2a^{*2} \times U_{11} + \dots + 2hka^* \times b^* \times U_{12}]$

| c(Pro-Phe-Pro-Phe) |          |          |          |           |          |          | c(Pro-Phe-Pro-D-Phe) |          |          |          |          |          |           |
|--------------------|----------|----------|----------|-----------|----------|----------|----------------------|----------|----------|----------|----------|----------|-----------|
| Atom               | $U_{11}$ | $U_{22}$ | $U_{33}$ | $U_{23}$  | $U_{13}$ | $U_{12}$ | Atom                 | $U_{11}$ | $U_{22}$ | $U_{33}$ | $U_{23}$ | $U_{13}$ | $U_{12}$  |
| N1                 | 19.9(8)  | 9.7(11)  | 15.5(7)  | 1.1(7)    | 5.4(6)   | -2.8(7)  | N1                   | 22.9(10) | 14.9(14) | 19.8(10) | -2.2(10) | 8.7(9)   | 1.3(10)   |
| C2                 | 18.1(9)  | 8.2(12)  | 16.3(9)  | -0.2(9)   | 4.6(7)   | -0.3(8)  | C2                   | 22.7(12) | 14.0(16) | 21.6(12) | 0.7(12)  | 8.5(10)  | -0.7(11)  |
| C3                 | 14.7(8)  | 10.5(13) | 17.6(9)  | -1.0(9)   | 3.0(7)   | 0.2(8)   | C3                   | 18.1(11) | 12.9(16) | 25.8(13) | 0.1(12)  | 10.5(10) | 0.1(11)   |
| O4                 | 28.8(8)  | 8.8(10)  | 20.0(7)  | 1.9(6)    | 3.0(6)   | 0.4(7)   | O4                   | 32.0(10) | 13.0(12) | 25.2(10) | -1.1(8)  | 10.0(8)  | -0.1(9)   |
| C5                 | 17.6(9)  | 19.9(14) | 21.1(9)  | -0.9(10)  | 5.8(7)   | 0.7(9)   | C5                   | 23.5(13) | 25.1(19) | 25.3(13) | 3.5(13)  | 12.5(10) | -1.5(12)  |
| C6                 | 21.4(10) | 21.4(15) | 20.1(10) | -1.1(10)  | 6.0(8)   | -5.8(10) | C6                   | 24.9(13) | 27.4(19) | 26.6(14) | 0.4(13)  | 13.3(11) | 1.8(13)   |
| C7                 | 24.7(10) | 13.1(14) | 17.7(9)  | -1.2(9)   | 8.1(8)   | -3.9(9)  | C7                   | 29.2(13) | 16.4(18) | 23.3(13) | -1.1(12) | 13.7(11) | 3.1(12)   |
| N8                 | 19.2(8)  | 10.7(11) | 12.9(8)  | 2.2(8)    | 3.4(6)   | -0.2(7)  | N8                   | 22.0(10) | 12.5(15) | 20.5(11) | -2.8(10) | 8.4(9)   | -1.1(10)  |
| C9                 | 21.8(10) | 9.4(13)  | 14.1(9)  | -0.9(8)   | 2.4(7)   | 0.3(9)   | C9                   | 26.5(13) | 15.3(17) | 17.9(12) | -0.6(11) | 7.6(10)  | -1.8(12)  |
| C10                | 24.6(10) | 13.3(14) | 13.4(9)  | 0.4(8)    | 3.4(7)   | 0.0(9)   | C10                  | 30.0(13) | 15.3(17) | 19.0(12) | -2.2(11) | 10.6(11) | -1.4(12)  |
| O11                | 30.2(8)  | 19.1(11) | 19.5(7)  | -6.2(7)   | 3.8(6)   | -0.4(7)  | O11                  | 33.5(11) | 25.5(14) | 24.9(10) | 7.5(9)   | 12.1(8)  | 3.4(9)    |
| C12                | 22.7(10) | 15.6(14) | 19.7(10) | -3.4(9)   | -0.4(8)  | -1.6(9)  | C12                  | 26.3(13) | 20.0(18) | 26.0(14) | 4.9(13)  | 6.5(11)  | 0.0(12)   |
| C13                | 20.7(10) | 15.6(14) | 18.9(9)  | -3.7(9)   | -2.5(8)  | -3.7(9)  | C13                  | 20.5(12) | 20.9(18) | 24.3(13) | 4.8(12)  | 3.6(10)  | 3.3(12)   |
| C14                | 27.1(11) | 16.4(14) | 22.4(10) | -2.4(10)  | -2.0(8)  | -3.7(10) | C14                  | 30.5(14) | 25.9(19) | 26.5(14) | -2.9(13) | 7.2(12)  | 0.5(14)   |
| C15                | 27.7(11) | 18.5(15) | 24.9(11) | -2.8(10)  | 1.8(9)   | -4.1(10) | C15                  | 29.9(14) | 23.1(19) | 26.7(13) | 2.9(13)  | 7.8(11)  | 3.6(13)   |
| C16                | 30.1(12) | 20.5(16) | 38.4(13) | -6.1(11)  | -7.6(10) | 3.4(11)  | C16                  | 34.0(16) | 34(2)    | 39.9(17) | 1.8(15)  | 19.5(14) | 4.0(15)   |
| C17                | 28.7(12) | 36(2)    | 40.5(14) | -10.2(13) | 13.1(11) | -8.4(12) | C17                  | 30.9(15) | 24(2)    | 37.1(17) | -2.3(15) | 2.7(13)  | -3.9(13)  |
| C18                | 22.1(11) | 32.6(19) | 52.7(15) | -14.4(15) | 5.0(10)  | 0.5(12)  | C18                  | 27.7(14) | 31(2)    | 49.7(19) | 7.0(17)  | 16.1(14) | -0.4(14)  |
| N19                | 23.3(9)  | 11.6(11) | 15.3(8)  | -1.2(7)   | 5.0(6)   | 1.3(8)   | N19                  | 26.3(11) | 16.1(14) | 21.8(11) | 1.4(10)  | 11.4(9)  | -2.9(10)  |
| C20                | 19.8(9)  | 8.7(13)  | 17.6(9)  | 0.0(8)    | 5.0(7)   | 0.7(8)   | C20                  | 24.5(13) | 14.6(16) | 24.2(13) | -0.1(12) | 11.4(11) | -1.2(11)  |
| C21                | 14.3(9)  | 8.9(13)  | 17.7(9)  | -1.1(9)   | 2.6(7)   | -0.8(8)  | C21                  | 16.7(11) | 17.0(18) | 25.1(13) | -1.7(12) | 9.4(10)  | -1.2(11)  |
| O22                | 23.9(7)  | 10.8(10) | 18.5(7)  | 0.3(7)    | 4.0(5)   | 0.2(6)   | O22                  | 26.4(10) | 18.9(13) | 28.8(10) | -2.9(9)  | 10.5(8)  | -1.7(9)   |
| C23                | 20.4(10) | 19.7(15) | 18.8(9)  | 1.8(9)    | 6.6(8)   | -0.6(9)  | C23                  | 26.2(14) | 24.9(19) | 27.7(14) | -4.4(13) | 15.0(12) | -1.9(13)  |
| C24                | 24.6(10) | 19.4(15) | 21.2(10) | 1.6(10)   | 8.4(8)   | 4.8(10)  | C24                  | 33.1(15) | 24(2)    | 31.3(15) | -3.2(13) | 18.7(12) | -6.9(13)  |
| C25                | 27.4(11) | 12.4(14) | 18.8(9)  | -0.9(9)   | 8.2(8)   | 4.6(10)  | C25                  | 33.2(14) | 19.3(18) | 27.3(13) | 0.2(13)  | 17.9(11) | -5.5(13)  |
| N26                | 19.4(8)  | 8.2(12)  | 16.0(8)  | 2.9(8)    | 4.3(6)   | -0.9(7)  | N26                  | 24.6(11) | 14.9(16) | 22.2(12) | -3.3(10) | 8.1(9)   | -0.4(10)  |
| C27                | 18.7(9)  | 9.8(13)  | 14.3(9)  | 0.0(8)    | 2.6(7)   | -0.1(9)  | C27                  | 22.8(13) | 29.7(19) | 20.9(13) | -2.8(12) | 6.8(11)  | 1.6(12)   |
| C28                | 23.4(10) | 10.1(13) | 14.1(9)  | -0.3(9)   | 5.1(7)   | 0.7(9)   | C28                  | 26.0(13) | 16.9(17) | 20.2(13) | 4.0(12)  | 8.4(10)  | 1.3(12)   |
| O29                | 25.5(7)  | 16.9(10) | 19.7(7)  | 6.2(7)    | 3.2(6)   | -0.6(7)  | O29                  | 29.8(10) | 27.8(14) | 23.8(10) | -7.2(9)  | 8.3(8)   | -1.3(9)   |
| C30                | 19.5(10) | 13.7(13) | 18.0(9)  | 2.5(9)    | 1.0(8)   | 0.4(9)   | C30                  | 30.0(14) | 27(2)    | 26.4(14) | 3.3(13)  | 9.5(12)  | 0.8(13)   |
| C31                | 18.3(9)  | 13.2(13) | 18.0(9)  | 3.4(9)    | -0.4(7)  | 1.5(9)   | C31                  | 26.1(13) | 26.7(19) | 25.4(14) | 2.9(13)  | 5.2(11)  | 4.2(13)   |
| C32                | 25.2(10) | 22.1(16) | 22.4(10) | -0.5(10)  | 3.6(8)   | 1.6(10)  | C32                  | 31.8(15) | 28(2)    | 34.4(16) | -0.7(14) | 10.8(12) | -7.1(14)  |
| C33                | 21.1(10) | 15.4(14) | 22.3(9)  | 1.2(9)    | -0.1(8)  | 3.3(9)   | C33                  | 36.9(16) | 32(2)    | 33.7(16) | -1.9(15) | 9.2(13)  | -4.4(15)  |
| C34                | 26.3(11) | 32.8(18) | 32.0(12) | 5.1(11)   | 10.9(9)  | 0.3(11)  | C34                  | 51(2)    | 34(2)    | 46.7(19) | -3.9(17) | 28.4(17) | 2.8(17)   |
| C35                | 24.8(11) | 13.2(15) | 34.3(12) | -0.1(10)  | -2.1(9)  | -0.2(10) | C35                  | 36.0(17) | 50(3)    | 39.5(18) | 1.7(19)  | 10.0(14) | -12.6(18) |
| C36                | 22.2(11) | 23.1(16) | 43.3(14) | 7.6(12)   | 4.7(10)  | -4.6(11) | C36                  | 26.9(15) | 65(3)    | 46.4(19) | 13(2)    | 21.3(14) | 1.2(17)   |

**Table S3:** Bond Lengths in Å for **c(Pro-Phe-Pro-Phe)** and **c(Pro-Phe-Pro-D-Phe)**, respectively.

| c(Pro-Phe-Pro-Phe) |      |            | c(Pro-Phe-Pro-D-Phe) |      |            |
|--------------------|------|------------|----------------------|------|------------|
| Atom               | Atom | Length [Å] | Atom                 | Atom | Length [Å] |
| N1                 | C2   | 1.469(3)   | N1                   | C2   | 1.477(4)   |
| N1                 | C7   | 1.480(3)   | N1                   | C7   | 1.483(3)   |
| N1                 | C28  | 1.364(3)   | N1                   | C28  | 1.357(3)   |
| C2                 | C3   | 1.533(3)   | C2                   | C3   | 1.535(3)   |
| C2                 | C5   | 1.555(3)   | C2                   | C5   | 1.554(3)   |
| C3                 | O4   | 1.228(3)   | C3                   | O4   | 1.229(4)   |
| C3                 | N8   | 1.341(3)   | C3                   | N8   | 1.338(4)   |
| C5                 | C6   | 1.527(4)   | C5                   | C6   | 1.523(5)   |
| C6                 | C7   | 1.517(3)   | C6                   | C7   | 1.512(4)   |
| N8                 | C9   | 1.465(2)   | N8                   | C9   | 1.469(3)   |
| C9                 | C10  | 1.541(3)   | C9                   | C10  | 1.539(4)   |
| C9                 | C12  | 1.540(3)   | C9                   | C12  | 1.533(4)   |
| C10                | O11  | 1.229(3)   | C10                  | O11  | 1.226(3)   |
| C10                | N19  | 1.352(3)   | C10                  | N19  | 1.348(4)   |
| C12                | C13  | 1.509(3)   | C12                  | C13  | 1.508(4)   |
| C13                | C14  | 1.391(4)   | C13                  | C14  | 1.395(4)   |
| C13                | C15  | 1.393(3)   | C13                  | C15  | 1.384(5)   |
| C14                | C16  | 1.391(4)   | C14                  | C16  | 1.387(5)   |
| C15                | C17  | 1.391(4)   | C15                  | C17  | 1.389(5)   |
| C16                | C18  | 1.387(4)   | C16                  | C18  | 1.380(5)   |
| C17                | C18  | 1.378(5)   | C17                  | C18  | 1.380(5)   |
| N19                | C20  | 1.458(3)   | N19                  | C20  | 1.452(4)   |
| N19                | C25  | 1.474(3)   | N19                  | C25  | 1.474(3)   |
| C20                | C23  | 1.549(3)   | C20                  | C23  | 1.549(4)   |
| C21                | O22  | 1.225(3)   | C21                  | O22  | 1.225(4)   |
| C21                | N26  | 1.349(3)   | C21                  | N26  | 1.346(4)   |
| C23                | C24  | 1.533(4)   | C23                  | C24  | 1.533(5)   |
| C24                | C25  | 1.524(3)   | C24                  | C25  | 1.523(4)   |
| N26                | C27  | 1.462(2)   | N26                  | C27  | 1.452(4)   |
| C27                | C28  | 1.538(3)   | C27                  | C28  | 1.536(4)   |
| C27                | C30  | 1.536(3)   | C27                  | C30  | 1.516(4)   |
| C28                | O29  | 1.229(3)   | C28                  | O29  | 1.225(4)   |
| C30                | C31  | 1.508(3)   | C30                  | C31  | 1.523(4)   |
| C31                | C32  | 1.399(3)   | C31                  | C32  | 1.378(5)   |
| C31                | C33  | 1.390(3)   | C31                  | C33  | 1.382(5)   |
| C32                | C34  | 1.389(4)   | C32                  | C34  | 1.396(4)   |
| C33                | C35  | 1.387(3)   | C33                  | C35  | 1.375(5)   |
| C34                | C36  | 1.383(4)   | C34                  | C36  | 1.392(6)   |
| C35                | C36  | 1.389(4)   | C35                  | C36  | 1.368(6)   |

**Table S4:** Bond Angles in for **c(Pro-Phe-Pro-Phe)** and **c(Pro-Phe-Pro-D-Phe)**, respectively.

| c(Pro-Phe-Pro-Phe) |      |      |            | c(Pro-Phe-Pro-D-Phe) |      |      |           |
|--------------------|------|------|------------|----------------------|------|------|-----------|
| Atom               | Atom | Atom | Angle [°]  | Atom                 | Atom | Atom | Angle [°] |
| C28                | N1   | C2   | 125.52(18) | C28                  | N1   | C2   | 126.5(2)  |
| C28                | N1   | C7   | 116.57(17) | C28                  | N1   | C7   | 115.8(2)  |
| C2                 | N1   | C7   | 111.49(17) | C2                   | N1   | C7   | 110.8(2)  |
| C3                 | N8   | C9   | 121.32(19) | C3                   | N8   | C9   | 121.4(3)  |
| C21                | N26  | C27  | 121.1(2)   | C21                  | N26  | C27  | 119.3(3)  |
| C20                | N19  | C25  | 112.39(17) | C20                  | N19  | C25  | 112.7(2)  |
| C10                | N19  | C20  | 127.11(18) | C10                  | N19  | C20  | 128.1(2)  |
| C10                | N19  | C25  | 118.23(18) | C10                  | N19  | C25  | 119.0(2)  |
| O29                | C28  | N1   | 120.7(2)   | O29                  | C28  | N1   | 121.1(2)  |
| O29                | C28  | C27  | 120.63(18) | O29                  | C28  | C27  | 116.3(2)  |

| c(Pro-Phe-Pro-Phe) |      |      |            | c(Pro-Phe-Pro-D-Phe) |      |      |           |
|--------------------|------|------|------------|----------------------|------|------|-----------|
| Atom               | Atom | Atom | Angle [°]  | Atom                 | Atom | Atom | Angle [°] |
| N1                 | C28  | C27  | 118.61(18) | N1                   | C28  | C27  | 122.4(2)  |
| O22                | C21  | N26  | 123.43(18) | O22                  | C21  | N26  | 122.6(3)  |
| O22                | C21  | C20  | 123.03(19) | O22                  | C21  | C20  | 122.9(3)  |
| N26                | C21  | C20  | 113.5(2)   | N26                  | C21  | C20  | 114.5(3)  |
| O4                 | C3   | N8   | 123.84(18) | O4                   | C3   | N8   | 123.7(2)  |
| O4                 | C3   | C2   | 117.2(2)   | O4                   | C3   | C2   | 116.3(3)  |
| N8                 | C3   | C2   | 118.9(2)   | N8                   | C3   | C2   | 119.9(3)  |
| C32                | C31  | C30  | 120.9(2)   | C32                  | C31  | C30  | 121.0(3)  |
| C33                | C31  | C30  | 120.70(19) | C33                  | C31  | C30  | 120.2(3)  |
| C33                | C31  | C32  | 118.3(2)   | C33                  | C31  | C32  | 118.8(3)  |
| N19                | C20  | C21  | 111.75(18) | N19                  | C20  | C21  | 111.6(2)  |
| N19                | C20  | C23  | 102.61(17) | N19                  | C20  | C23  | 103.0(2)  |
| C21                | C20  | C23  | 109.03(16) | C21                  | C20  | C23  | 108.5(2)  |
| N1                 | C2   | C3   | 117.84(18) | N1                   | C2   | C3   | 119.6(2)  |
| N1                 | C2   | C5   | 103.23(17) | N1                   | C2   | C5   | 103.0(2)  |
| C3                 | C2   | C5   | 108.26(16) | C3                   | C2   | C5   | 107.1(2)  |
| N1                 | C7   | C6   | 102.66(17) | N1                   | C7   | C6   | 102.9(2)  |
| O11                | C10  | N19  | 120.66(19) | O11                  | C10  | N19  | 120.6(3)  |
| O11                | C10  | C9   | 120.36(19) | O11                  | C10  | C9   | 120.2(2)  |
| N19                | C10  | C9   | 118.96(19) | N19                  | C10  | C9   | 119.1(3)  |
| C31                | C30  | C27  | 114.24(19) | C31                  | C30  | C27  | 110.2(2)  |
| N26                | C27  | C28  | 112.23(16) | N26                  | C27  | C28  | 115.1(2)  |
| N26                | C27  | C30  | 111.88(16) | N26                  | C27  | C30  | 111.2(3)  |
| C30                | C27  | C28  | 109.24(18) | C30                  | C27  | C28  | 114.2(2)  |
| C15                | C13  | C12  | 120.4(2)   | C15                  | C13  | C12  | 120.9(3)  |
| C14                | C13  | C12  | 121.1(2)   | C14                  | C13  | C12  | 120.8(3)  |
| C14                | C13  | C15  | 118.3(2)   | C14                  | C13  | C15  | 118.2(3)  |
| C34                | C32  | C31  | 120.6(2)   | C34                  | C32  | C31  | 120.6(3)  |
| N19                | C25  | C24  | 102.99(18) | N19                  | C25  | C24  | 103.7(2)  |
| C6                 | C5   | C2   | 103.04(19) | C6                   | C5   | C2   | 103.6(2)  |
| C35                | C33  | C31  | 121.2(2)   | C35                  | C33  | C31  | 120.7(3)  |
| N8                 | C9   | C10  | 113.58(17) | N8                   | C9   | C10  | 113.6(2)  |
| N8                 | C9   | C12  | 111.22(16) | N8                   | C9   | C12  | 110.8(2)  |
| C12                | C9   | C10  | 107.87(18) | C12                  | C9   | C10  | 108.6(2)  |
| C13                | C12  | C9   | 115.20(19) | C13                  | C12  | C9   | 115.2(2)  |
| C7                 | C6   | C5   | 102.46(19) | C7                   | C6   | C5   | 102.1(2)  |
| C24                | C23  | C20  | 102.68(19) | C24                  | C23  | C20  | 103.0(2)  |
| C17                | C15  | C13  | 120.7(3)   | C17                  | C15  | C13  | 121.2(3)  |
| C16                | C14  | C13  | 120.9(2)   | C16                  | C14  | C13  | 120.7(3)  |
| C25                | C24  | C23  | 101.98(19) | C25                  | C24  | C23  | 103.2(2)  |
| C36                | C34  | C32  | 120.2(2)   | C36                  | C34  | C32  | 119.6(3)  |
| C34                | C36  | C35  | 119.8(2)   | C34                  | C36  | C35  | 119.2(3)  |
| C33                | C35  | C36  | 119.9(2)   | C33                  | C35  | C36  | 121.0(3)  |
| C18                | C16  | C14  | 119.9(3)   | C18                  | C16  | C14  | 120.3(3)  |
| C17                | C18  | C16  | 119.7(2)   | C17                  | C18  | C16  | 119.6(3)  |
| C18                | C17  | C15  | 120.3(3)   | C18                  | C17  | C15  | 120.0(3)  |

**Table S5:** Torsion Angles in for c(Pro-Phe-Pro-Phe) and c(Pro-Phe-Pro-D-Phe), respectively.

| c(Pro-Phe-Pro-Phe) |     |     |     |            | c(Pro-Phe-Pro-D-Phe) |     |     |     |           |
|--------------------|-----|-----|-----|------------|----------------------|-----|-----|-----|-----------|
| A                  | B   | C   | D   | Angle [°]  | A                    | B   | C   | D   | Angle [°] |
| O22                | C21 | C20 | N19 | -26.5(3)   | O22                  | C21 | C20 | N19 | -26.2(3)  |
| O22                | C21 | C20 | C23 | 86.2(2)    | O22                  | C21 | C20 | C23 | 86.6(3)   |
| O29                | C28 | C27 | N26 | -137.0(2)  | O29                  | C28 | C27 | N26 | -155.3(3) |
| O29                | C28 | C27 | C30 | -12.3(3)   | O29                  | C28 | C27 | C30 | 74.1(4)   |
| O4                 | C3  | C2  | N1  | 157.54(19) | O4                   | C3  | C2  | N1  | 158.2(2)  |
| O4                 | C3  | C2  | C5  | -85.9(2)   | O4                   | C3  | C2  | C5  | -85.3(3)  |

| c(Pro-Phe-Pro-Phe) |     |     |     |             | c(Pro-Phe-Pro-D-Phe) |     |     |     |           |
|--------------------|-----|-----|-----|-------------|----------------------|-----|-----|-----|-----------|
| A                  | B   | C   | D   | Angle [°]   | A                    | B   | C   | D   | Angle [°] |
| O11                | C10 | C9  | N8  | -136.6(2)   | O11                  | C10 | C9  | N8  | -133.3(3) |
| O11                | C10 | C9  | C12 | -12.8(3)    | O11                  | C10 | C9  | C12 | -9.5(4)   |
| N1                 | C28 | C27 | N26 | 44.8(3)     | N1                   | C28 | C27 | N26 | 19.6(4)   |
| N1                 | C28 | C27 | C30 | 169.53(19)  | N1                   | C28 | C27 | C30 | -110.9(3) |
| N1                 | C2  | C5  | C6  | 27.40(19)   | N1                   | C2  | C5  | C6  | 26.5(3)   |
| N1                 | C7  | C6  | C5  | 37.8(2)     | N1                   | C7  | C6  | C5  | 38.9(3)   |
| N8                 | C3  | C2  | N1  | -25.2(3)    | N8                   | C3  | C2  | N1  | -25.5(3)  |
| N8                 | C3  | C2  | C5  | 91.4(2)     | N8                   | C3  | C2  | C5  | 91.0(3)   |
| N8                 | C9  | C12 | C13 | -58.4(3)    | N8                   | C9  | C12 | C13 | -62.8(3)  |
| N26                | C21 | C20 | N19 | 154.66(17)  | N26                  | C21 | C20 | N19 | 156.9(2)  |
| N26                | C21 | C20 | C23 | -92.6(2)    | N26                  | C21 | C20 | C23 | -90.3(3)  |
| N19                | C20 | C23 | C24 | 31.9(2)     | N19                  | C20 | C23 | C24 | 31.4(3)   |
| N19                | C10 | C9  | N8  | 44.9(3)     | N19                  | C10 | C9  | N8  | 50.7(4)   |
| N19                | C10 | C9  | C12 | 168.70(19)  | N19                  | C10 | C9  | C12 | 174.5(2)  |
| N19                | C25 | C24 | C23 | 35.0(2)     | N19                  | C25 | C24 | C23 | 30.2(3)   |
| C28                | N1  | C2  | C3  | -93.9(2)    | C28                  | N1  | C2  | C3  | -94.1(3)  |
| C28                | N1  | C2  | C5  | 146.8(2)    | C28                  | N1  | C2  | C5  | 147.3(3)  |
| C28                | N1  | C7  | C6  | -174.90(19) | C28                  | N1  | C7  | C6  | -176.2(3) |
| C21                | N26 | C27 | C28 | 53.4(2)     | C21                  | N26 | C27 | C28 | 74.1(3)   |
| C21                | N26 | C27 | C30 | -69.8(2)    | C21                  | N26 | C27 | C30 | -153.9(2) |
| C21                | C20 | C23 | C24 | -86.7(2)    | C21                  | C20 | C23 | C24 | -87.0(3)  |
| C3                 | N8  | C9  | C10 | -130.5(2)   | C3                   | N8  | C9  | C10 | -129.4(3) |
| C3                 | N8  | C9  | C12 | 107.6(2)    | C3                   | N8  | C9  | C12 | 108.0(3)  |
| C3                 | C2  | C5  | C6  | -98.2(2)    | C3                   | C2  | C5  | C6  | -100.5(3) |
| C31                | C30 | C27 | N26 | -57.9(3)    | C31                  | C30 | C27 | N26 | 69.8(3)   |
| C31                | C30 | C27 | C28 | 177.20(17)  | C31                  | C30 | C27 | C28 | -157.7(3) |
| C31                | C32 | C34 | C36 | 0.0(4)      | C31                  | C32 | C34 | C36 | -2.0(5)   |
| C31                | C33 | C35 | C36 | -0.6(3)     | C31                  | C33 | C35 | C36 | -0.9(6)   |
| C20                | N19 | C10 | O11 | -165.9(2)   | C20                  | N19 | C10 | O11 | -175.9(3) |
| C20                | N19 | C10 | C9  | 12.5(3)     | C20                  | N19 | C10 | C9  | 0.1(4)    |
| C20                | N19 | C25 | C24 | -15.6(2)    | C20                  | N19 | C25 | C24 | -10.7(3)  |
| C20                | C23 | C24 | C25 | -41.65(19)  | C20                  | C23 | C24 | C25 | -38.3(3)  |
| C2                 | N1  | C28 | O29 | -160.9(2)   | C2                   | N1  | C28 | O29 | -153.2(3) |
| C2                 | N1  | C28 | C27 | 17.3(3)     | C2                   | N1  | C28 | C27 | 32.1(4)   |
| C2                 | N1  | C7  | C6  | -21.4(2)    | C2                   | N1  | C7  | C6  | -23.2(3)  |
| C2                 | C5  | C6  | C7  | -40.62(19)  | C2                   | C5  | C6  | C7  | -40.7(3)  |
| C7                 | N1  | C28 | O29 | -11.6(3)    | C7                   | N1  | C28 | O29 | -5.1(4)   |
| C7                 | N1  | C28 | C27 | 166.60(18)  | C7                   | N1  | C28 | C27 | -179.8(3) |
| C7                 | N1  | C2  | C3  | 115.41(19)  | C7                   | N1  | C2  | C3  | 116.5(3)  |
| C7                 | N1  | C2  | C5  | -3.8(2)     | C7                   | N1  | C2  | C5  | -2.1(3)   |
| C10                | N19 | C20 | C21 | -91.2(2)    | C10                  | N19 | C20 | C21 | -81.5(3)  |
| C10                | N19 | C20 | C23 | 152.1(2)    | C10                  | N19 | C20 | C23 | 162.3(3)  |
| C10                | N19 | C25 | C24 | -179.8(2)   | C10                  | N19 | C25 | C24 | 173.4(3)  |
| C10                | C9  | C12 | C13 | 176.43(18)  | C10                  | C9  | C12 | C13 | 171.8(2)  |
| C30                | C31 | C32 | C34 | 176.9(2)    | C30                  | C31 | C32 | C34 | -178.3(3) |
| C30                | C31 | C33 | C35 | -176.6(2)   | C30                  | C31 | C33 | C35 | 179.7(3)  |
| C27                | N26 | C21 | O22 | -2.4(3)     | C27                  | N26 | C21 | O22 | -5.4(4)   |
| C27                | N26 | C21 | C20 | 176.46(16)  | C27                  | N26 | C21 | C20 | 171.5(2)  |
| C13                | C15 | C17 | C18 | 0.1(4)      | C13                  | C15 | C17 | C18 | -0.4(5)   |
| C13                | C14 | C16 | C18 | -0.5(4)     | C13                  | C14 | C16 | C18 | -0.8(5)   |
| C32                | C31 | C30 | C27 | 101.8(2)    | C32                  | C31 | C30 | C27 | -101.7(4) |
| C32                | C31 | C33 | C35 | 0.8(3)      | C32                  | C31 | C33 | C35 | -0.5(5)   |
| C32                | C34 | C36 | C35 | 0.2(4)      | C32                  | C34 | C36 | C35 | 0.6(6)    |
| C25                | N19 | C20 | C21 | 106.38(19)  | C25                  | N19 | C20 | C21 | 103.1(3)  |
| C25                | N19 | C20 | C23 | -10.3(2)    | C25                  | N19 | C20 | C23 | -13.1(3)  |
| C25                | N19 | C10 | O11 | -4.4(3)     | C25                  | N19 | C10 | O11 | -0.7(4)   |

| c(Pro-Phe-Pro-Phe) |     |     |     |             | c(Pro-Phe-Pro-D-Phe) |     |     |     |           |
|--------------------|-----|-----|-----|-------------|----------------------|-----|-----|-----|-----------|
| A                  | B   | C   | D   | Angle [°]   | A                    | B   | C   | D   | Angle [°] |
| C25                | N19 | C10 | C9  | 174.03(19)  | C25                  | N19 | C10 | C9  | 175.3(2)  |
| C33                | C31 | C30 | C27 | -80.8(2)    | C33                  | C31 | C30 | C27 | 78.1(4)   |
| C33                | C31 | C32 | C34 | -0.5(3)     | C33                  | C31 | C32 | C34 | 1.9(5)    |
| C9                 | N8  | C3  | O4  | 5.3(3)      | C9                   | N8  | C3  | O4  | 5.5(4)    |
| C9                 | N8  | C3  | C2  | -171.75(16) | C9                   | N8  | C3  | C2  | -170.6(2) |
| C12                | C13 | C15 | C17 | 174.8(2)    | C12                  | C13 | C15 | C17 | -176.1(3) |
| C12                | C13 | C14 | C16 | -174.6(2)   | C12                  | C13 | C14 | C16 | 176.6(3)  |
| C15                | C13 | C12 | C9  | 108.4(2)    | C15                  | C13 | C12 | C9  | -77.2(3)  |
| C15                | C13 | C14 | C16 | 1.2(3)      | C15                  | C13 | C14 | C16 | 0.2(4)    |
| C14                | C13 | C12 | C9  | -75.9(3)    | C14                  | C13 | C12 | C9  | -77.2(3)  |
| C14                | C13 | C15 | C17 | -1.1(3)     | C14                  | C13 | C15 | C17 | 0.4(4)    |
| C14                | C16 | C18 | C17 | -0.5(4)     | C14                  | C16 | C18 | C17 | 0.8(5)    |
| C34                | C36 | C35 | C33 | 0.1(4)      | C34                  | C36 | C35 | C33 | 0.8(6)    |
| C16                | C18 | C17 | C15 | 0.7(4)      | C16                  | C18 | C17 | C15 | -0.2(5)   |

**Table S6:** Hydrogen Fractional Atomic Coordinates ( $\times 10^4$ ) and Equivalent Isotropic Displacement Parameters ( $\text{\AA}^2 \times 10^3$ ) for **c(Pro-Phe-Pro-Phe)** and **c(Pro-Phe-Pro-D-Phe)**, respectively.  $U_{eq}$  is defined as 1/3 of the trace of the orthogonalized  $U_j$ .

| c(Pro-Phe-Pro-Phe) |          |          |          |          | c(Pro-Phe-Pro-D-Phe) |          |          |          |          |
|--------------------|----------|----------|----------|----------|----------------------|----------|----------|----------|----------|
| Atom               | x        | y        | z        | $U_{eq}$ | Atom                 | x        | y        | z        | $U_{eq}$ |
| H2                 | 5692.11  | 2614.66  | 1532.34  | 17       | H2                   | 4760.1   | 2166.1   | 3494.81  | 23       |
| H5A                | 7709.5   | 3580.39  | 2086.58  | 23       | H5A                  | 2630.25  | 3026.26  | 3019.45  | 28       |
| H5B                | 7272.24  | 3071.87  | 1172.45  | 23       | H5B                  | 3268.04  | 2414.52  | 3897.58  | 28       |
| H6A                | 7563.38  | 7967.82  | 1926.89  | 25       | H6A                  | 2761.57  | 7427.01  | 3226.55  | 30       |
| H6B                | 7998.06  | 7118.97  | 1166.89  | 25       | H6B                  | 2504.78  | 6400.72  | 3977.73  | 30       |
| H7A                | 6265.5   | 9593.29  | 944.53   | 22       | H7A                  | 4237.41  | 9020.71  | 4178.57  | 26       |
| H7B                | 6327.2   | 7193.67  | 385.56   | 22       | H7B                  | 4329.71  | 6475.84  | 4687.2   | 26       |
| H8                 | 6030(20) | 7950(60) | 2741(16) | 17(7)    | H8                   | 4060(20) | 7500(70) | 2304(17) | 18(8)    |
| H9                 | 6252.25  | 4988.43  | 4047.95  | 18       | H9                   | 3512.84  | 4493.15  | 1034.03  | 24       |
| H12A               | 7402.38  | 9606.28  | 3967.26  | 24       | H12A                 | 2355.88  | 9018.44  | 1209.47  | 29       |
| H12B               | 7464.2   | 7963.92  | 4738.87  | 24       | H12B                 | 2129.78  | 7521.83  | 423.93   | 29       |
| H14                | 8242.72  | 3428.08  | 4714.96  | 28       | H14                  | 1353.25  | 7891.37  | 2047.32  | 34       |
| H15                | 8646.21  | 8876.9   | 3182.6   | 29       | H15                  | 1400.64  | 2943.51  | 381.67   | 32       |
| H16                | 9757.48  | 1365.98  | 4505.07  | 38       | H16                  | -2.05    | 5455.53  | 2315.16  | 41       |
| H17                | 10154.2  | 6799.21  | 2969.7   | 41       | H17                  | 23.78    | 551.11   | 637.53   | 39       |
| H18                | 10721.93 | 3073.49  | 3636.02  | 43       | H18                  | -685.45  | 1811.25  | 1602.65  | 42       |
| H20                | 4343.01  | 4344.62  | 3445.58  | 18       | H20                  | 5571.48  | 3897.55  | 1540.49  | 24       |
| H23A               | 2311.8   | 5171.33  | 3005.93  | 23       | H23A                 | 7654.33  | 4986.54  | 1865.54  | 30       |
| H23B               | 2797.33  | 4712.52  | 3916.42  | 23       | H23B                 | 6981.75  | 4218.82  | 1004.99  | 30       |
| H24A               | 2406.8   | 9594.25  | 3152.03  | 25       | H24A                 | 7468.47  | 9341.94  | 1599.13  | 33       |
| H24B               | 2003.98  | 8709.88  | 3922.24  | 25       | H24B                 | 7637.37  | 8244.11  | 827.61   | 33       |
| H25A               | 3727.8   | 11291.8  | 4100.61  | 23       | H25A                 | 5883.44  | 10821.82 | 760.27   | 30       |
| H25B               | 3676.8   | 8968.93  | 4689.36  | 23       | H25B                 | 5815.2   | 8483.33  | 179.6    | 30       |
| H26                | 3878(18) | 3010(60) | 2164(14) | 11(6)    | H26                  | 6370(20) | 3050(70) | 2831(16) | 10(8)    |
| H27                | 3860.84  | 3010.73  | 932.56   | 17       | H27                  | 7362.72  | 6545.28  | 3799.64  | 29       |
| H30A               | 2505.88  | 7313.45  | 940.04   | 21       | H30A                 | 7058.43  | 1330.2   | 4076.05  | 33       |
| H30B               | 2579.98  | 5690.37  | 184.78   | 21       | H30B                 | 7628.1   | 3251.14  | 4757.45  | 33       |
| H32                | 1319.76  | 6024.28  | 1756.1   | 28       | H32                  | 8109.11  | -307.69  | 3300.45  | 38       |
| H33                | 1914.24  | 1166.93  | 113.67   | 24       | H33                  | 9327.77  | 5608.73  | 4693.44  | 41       |
| H34                | -73.54   | 3451.2   | 1945.36  | 36       | H34                  | 9796.12  | -801.18  | 3073.87  | 49       |
| H35                | 513.78   | -1381.6  | 295.5    | 30       | H35                  | 10969.89 | 5235.18  | 4431.94  | 50       |
| H36                | -481.87  | -247.94  | 1217.02  | 36       | H36                  | 11232.45 | 2036.72  | 3638.56  | 53       |



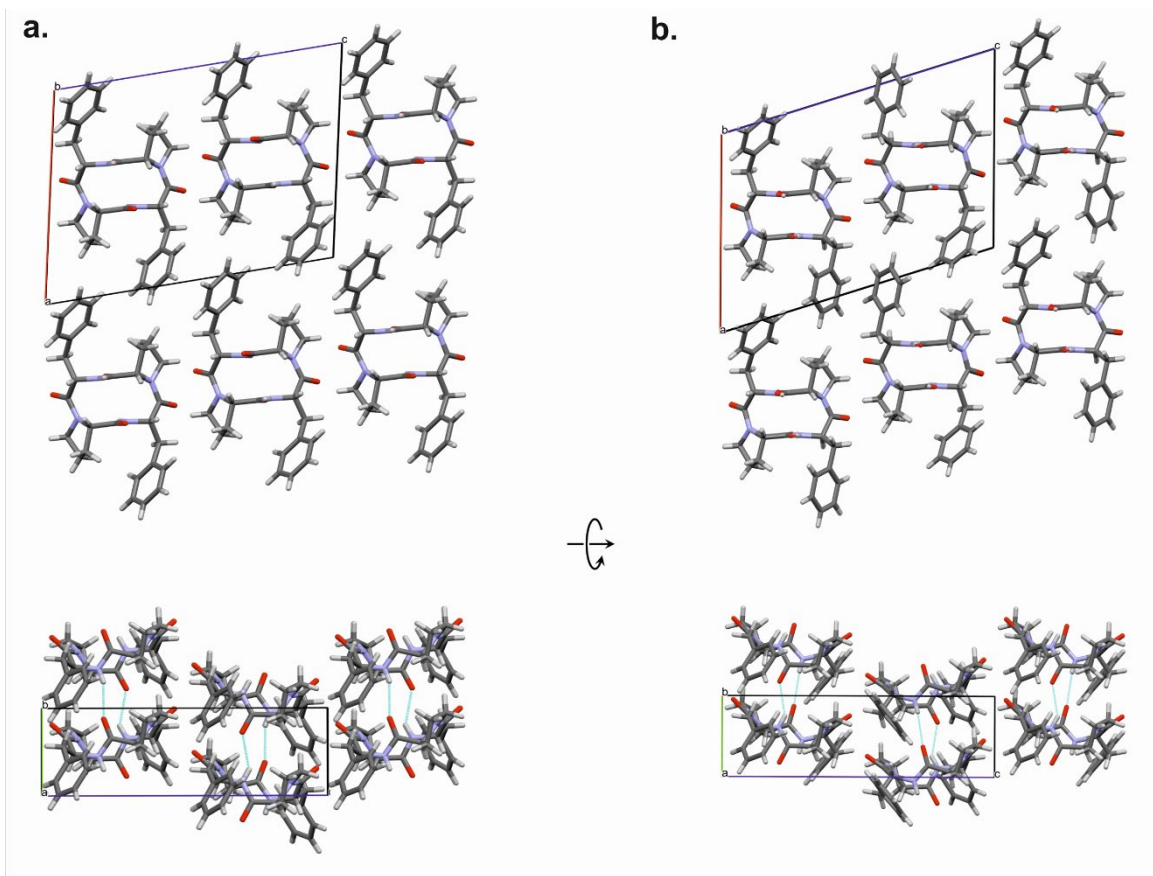

**Figure S5.** A crystal packing diagram of (a) c(Pro-Phe-Pro-Phe) (sample A) and (b) c(Pro-Phe-Pro-D-Phe) (sample B). The views along the *b*-axis are shown above, while the views along the *a*-axis are shown below.

### 3. Theoretical Calculations and ECD Spectroscopy

**Table S7.** Relative conformers energies with population at 298 K for sample **A** after DFT calculations at the B3LYP/6-311+G(d,p)/PCM(H<sub>2</sub>O) level of theory.

| Structure ID | Pop. [%] | $\Delta E$ [kcal/mol] |
|--------------|----------|-----------------------|
| 3            | 39.68    | 0                     |
| 1            | 21.46%   | 0.36                  |
| 2            | 21.31%   | 0.37                  |
| 5            | 8.21%    | 0.93                  |
| 9            | 3.63%    | 1.41                  |
| X-Ray        | 3.14%    | 1.50                  |
| 4            | 1.41%    | 1.98                  |
| 7            | 0.52%    | 2.57                  |
| 10           | 0.31%    | 2.87                  |
| 8            | 0.28%    | 2.94                  |
| 6            | 0.05%    | 3.99                  |

**Table S8.** Relative conformers energies with population at 298 K for sample **B** after DFT calculations at the B3LYP/6-311+G(d,p)/PCM(H<sub>2</sub>O) level of theory.

| Structure ID | Pop. [%] | $\Delta E$ [kcal/mol] |
|--------------|----------|-----------------------|
| X-Ray        | 51.64%   | 0                     |
| 4            | 40.58%   | 0.14                  |
| 1            | 5.14%    | 1.36                  |
| 2            | 2.25%    | 1.86                  |
| 3            | 0.32%    | 3.02                  |

|   |       |      |
|---|-------|------|
| 7 | 0.05% | 4.12 |
| 6 | 0.03% | 4.51 |
| 5 | 0.00% | 6.76 |

#### 4. Molecular dynamics on the base of 2D NMR spectroscopy

**Table S9.** cPFPF sample heteriochiral B.

| Amino acids | Atoms          |                |                |                |                |                 |                 |                 |                 |                 |                 |       |       |
|-------------|----------------|----------------|----------------|----------------|----------------|-----------------|-----------------|-----------------|-----------------|-----------------|-----------------|-------|-------|
|             | C <sub>A</sub> | C <sub>B</sub> | C <sub>C</sub> | C <sub>D</sub> | H <sub>A</sub> | H <sub>B1</sub> | H <sub>B2</sub> | H <sub>C1</sub> | H <sub>C2</sub> | H <sub>D1</sub> | H <sub>D2</sub> | N     | NH    |
| xPro        | 58.24          | 31.62          | 21.21          | 47.97          | 4.200          | 2.093           | 1.782           | 1.778           | 1.712           | 3.456           | 3.413           | -     | -     |
| yPro        | 61.04          | 32.26          | 21.08          | 48.46          | 4.175          | 1.763           | 1.030           | 1.395           | 1.261           | 3.426           | 3.150           | -     | -     |
| 2Phe        | 59.04          | 35.30          | -              | -              | 4.284          | 3.020           | 2.840           | -               | -               | -               | -               | 116.4 | 8.487 |
| 4Phe        | 51.52          | 37.31          | -              | -              | 5.098          | 3.189           | 2.831           | -               | -               | -               | -               | 117.3 | 8.045 |

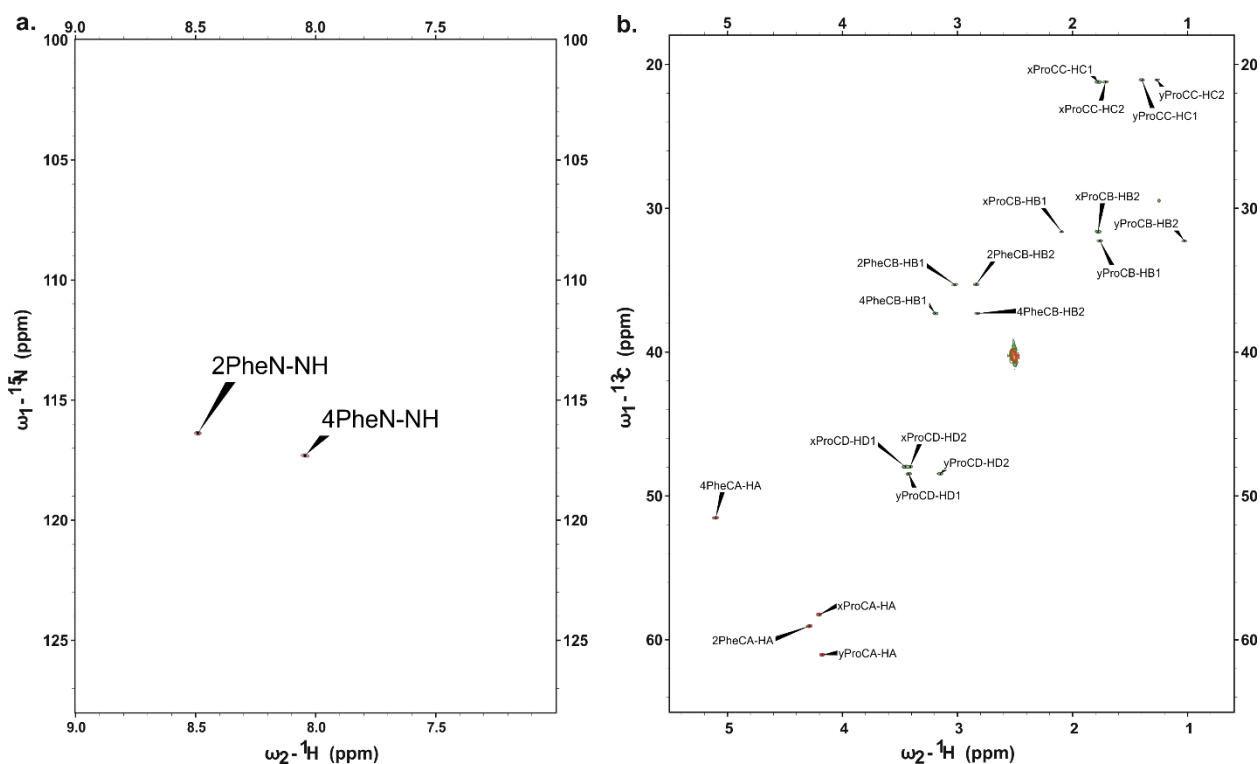

**Figure S6.** NMR spectra HSQC  $^1\text{H}$ - $^{15}\text{N}$  (a) and HSQC  $^1\text{H}$ - $^{13}\text{C}$  (b) of cPFPF-B in DMSO- $d_6$  (Heterochiral).

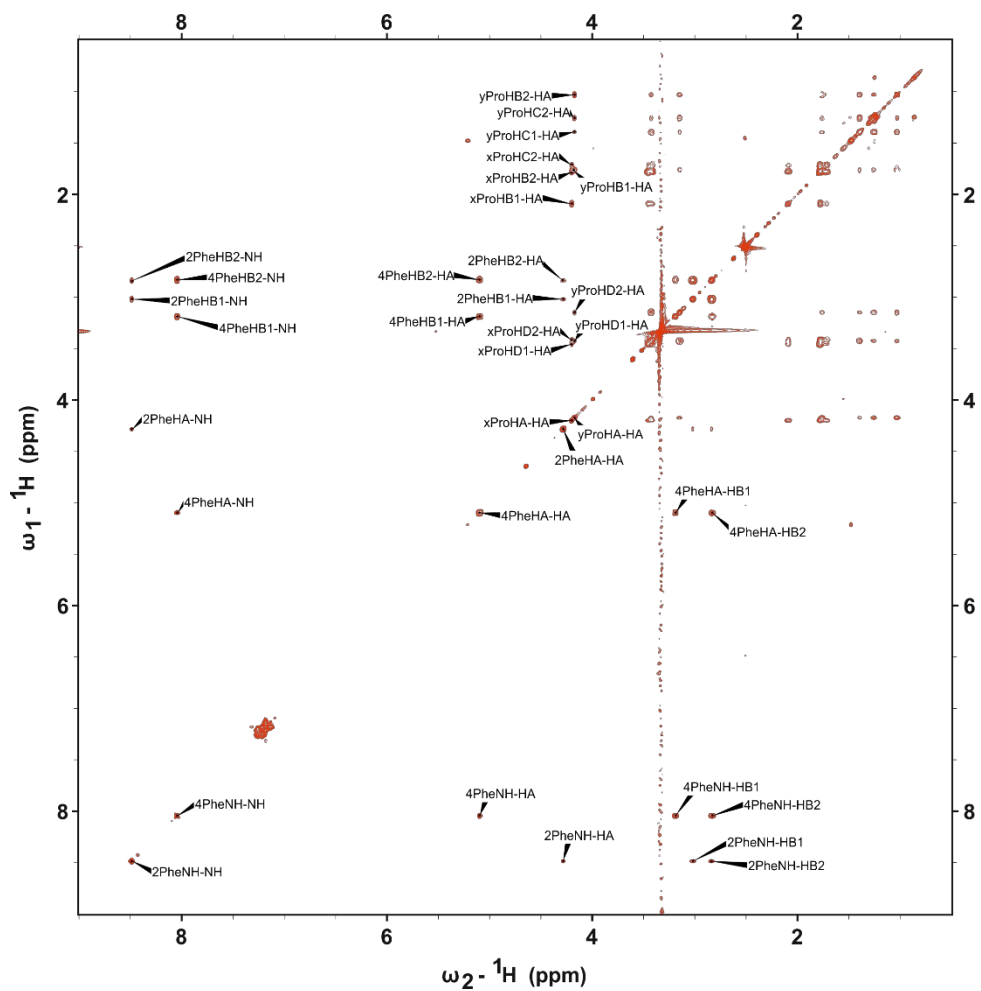

**Figure S7.** NMR TOCSY  $^1\text{H}$ - $^1\text{H}$  spectrum of cPFPF-B in DMSO- $d_6$  (Heterochiral).

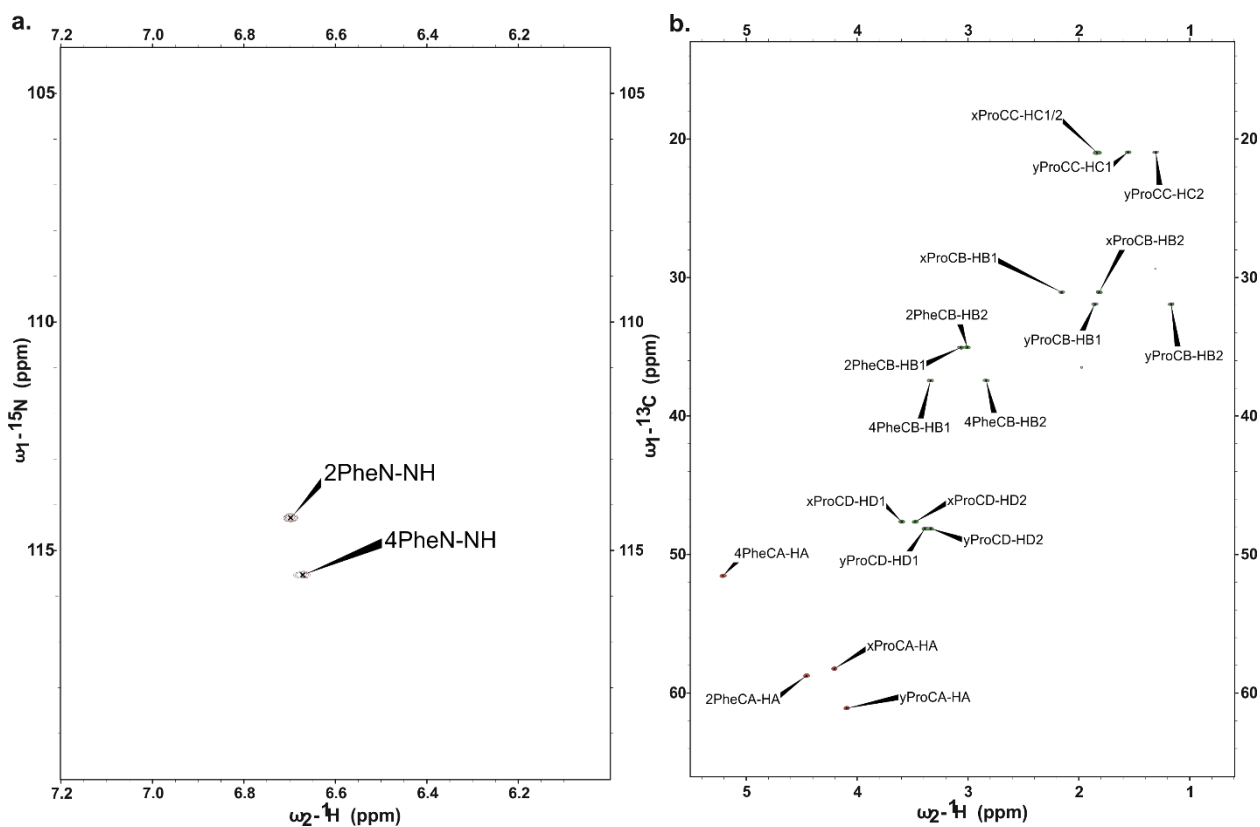

**Figure S8.** NMR spectra HSQC  $^1\text{H}$ - $^{15}\text{N}$  (a) and HSQC  $^1\text{H}$ - $^{13}\text{C}$  (b) of cPFPF-B in  $\text{CD}_3\text{CN}$  (Heterochiral).

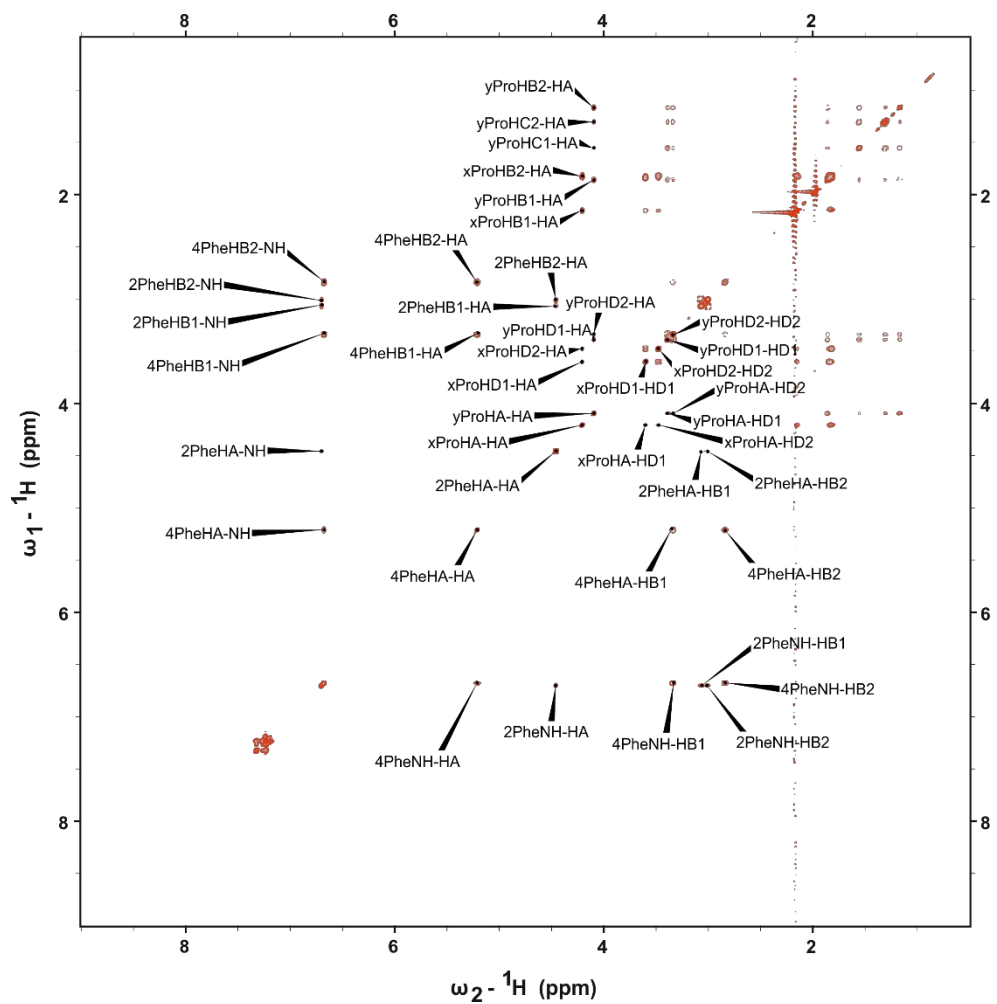

Figure S9. NMR TOCSY  $^1\text{H}$ - $^1\text{H}$  spectrum of cPFPF-B,  $\text{CD}_3\text{CN}$  (Heterochiral).

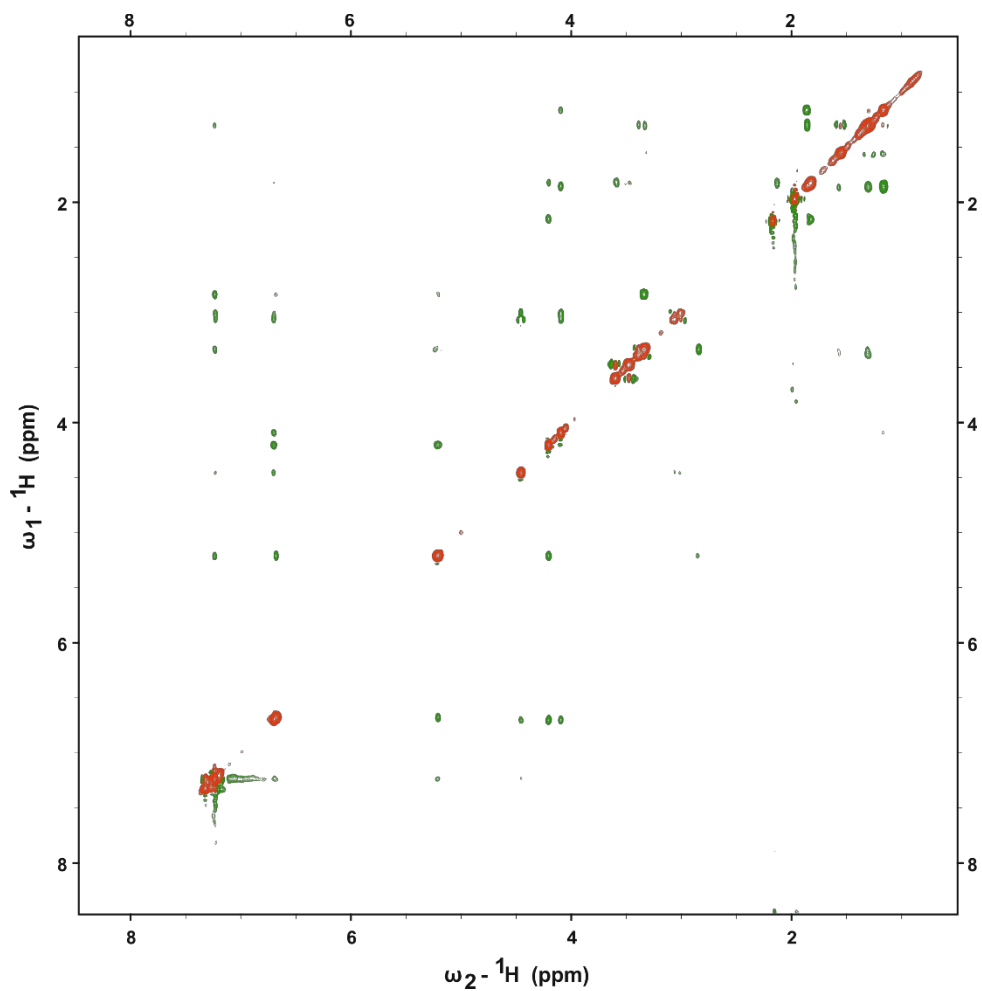

**Figure S10.** NMR NOESY  $^1\text{H}$ - $^1\text{H}$  spectrum of cPFPF-B,  $\text{CD}_3\text{CN}$  (Heterochiral).

**Table S10.** NMR chemical shifts of cPFPF sample homochiral A.

| Amino acids | Atoms               |                     |                     |                     |                     |                        |                          |                        |                        |                        |                        |                        | N     | NH    |
|-------------|---------------------|---------------------|---------------------|---------------------|---------------------|------------------------|--------------------------|------------------------|------------------------|------------------------|------------------------|------------------------|-------|-------|
|             | $\text{C}_\text{A}$ | $\text{C}_\text{B}$ | $\text{C}_\text{C}$ | $\text{C}_\text{D}$ | $\text{H}_\text{A}$ | $\text{H}_{\text{B}1}$ | $\text{H}_{\text{B}1/2}$ | $\text{H}_{\text{B}2}$ | $\text{H}_{\text{C}1}$ | $\text{H}_{\text{C}2}$ | $\text{H}_{\text{D}1}$ | $\text{H}_{\text{D}2}$ |       |       |
| U-xPro      | 62.37               | 31.41               | 21.61               | 47.70               | 4.056               | 1.905                  | -                        | 1.239                  | 1.676                  | 1.541                  | 3.503                  | 3.420                  | -     | -     |
| U-yPro      | 58.40               | 30.72               | 21.03               | 47.45               | 3.938               | 1.974                  | -                        | 1.658                  | 1.953                  | 1.885                  | 3.603                  | 3.427                  | -     | -     |
| S-1Pro      | 61.44               | 30.91               | 21.30               | 47.11               | 4.146               | 1.891                  | -                        | 1.715                  | 1.728                  | 1.362                  | 3.509                  | 3.312                  | -     | -     |
| S-Phe       | 51.75               | 37.10               | -                   | -                   | 4.999               | 3.192                  | -                        | 2.818                  | -                      | -                      | -                      | -                      | 118.0 | 7.024 |
| U-Phe       | 55.68               | 35.15               | -                   | -                   | 3.883               | -                      | 3.175                    | -                      | -                      | -                      | -                      | -                      | 109.6 | 6.708 |
| U-Phe       | 51.73               | 37.64               | -                   | -                   | 5.076               | 3.301                  | -                        | 2.820                  | -                      | -                      | -                      | -                      | 114.7 | 6.628 |

prefix S means form of peptide A with 2-fold symmetry and  
 prefix U means unsymmetrical form of A

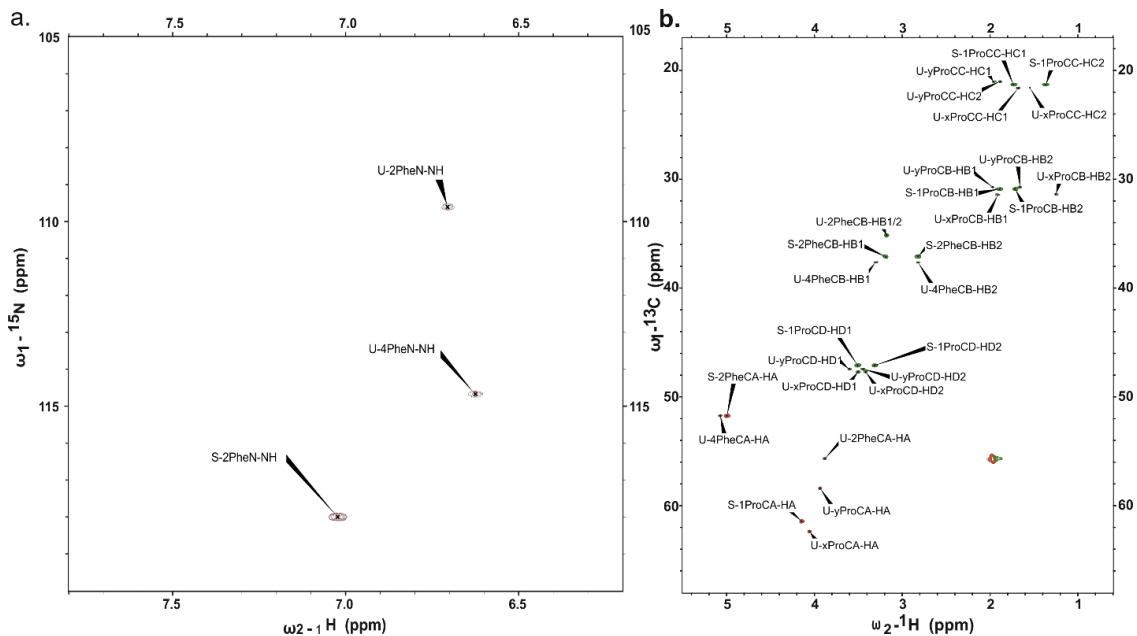

**Figure S11.** NMR HSQC  $^1\text{H}$ - $^{15}\text{N}$  (a) and HSQC  $^1\text{H}$ - $^{13}\text{C}$  (b) spectra of cPFPF-A,  $\text{CD}_3\text{CN}$  (Homochiral). Prefix S means form of peptide A with 2-fold symmetry and prefix U means unsymmetrical form of A.

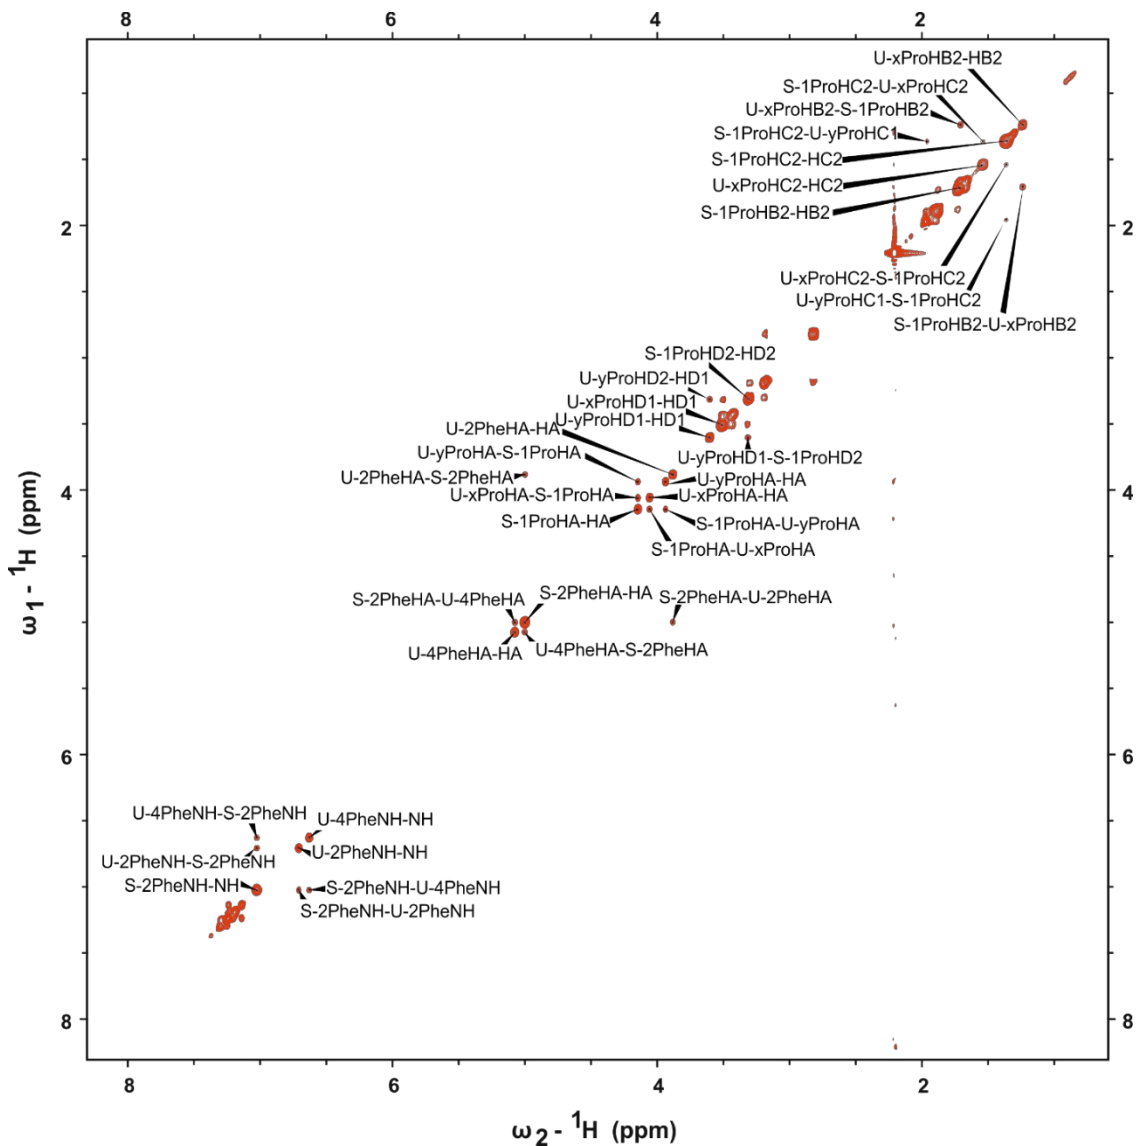

**Figure S12.** NMR EXSY-NOESY  $^1\text{H}$ - $^1\text{H}$  with mixing 50 ms spectrum of cPFPF-A in  $\text{CD}_3\text{CN}$  (Homochiral). Shown only EXSY signals.

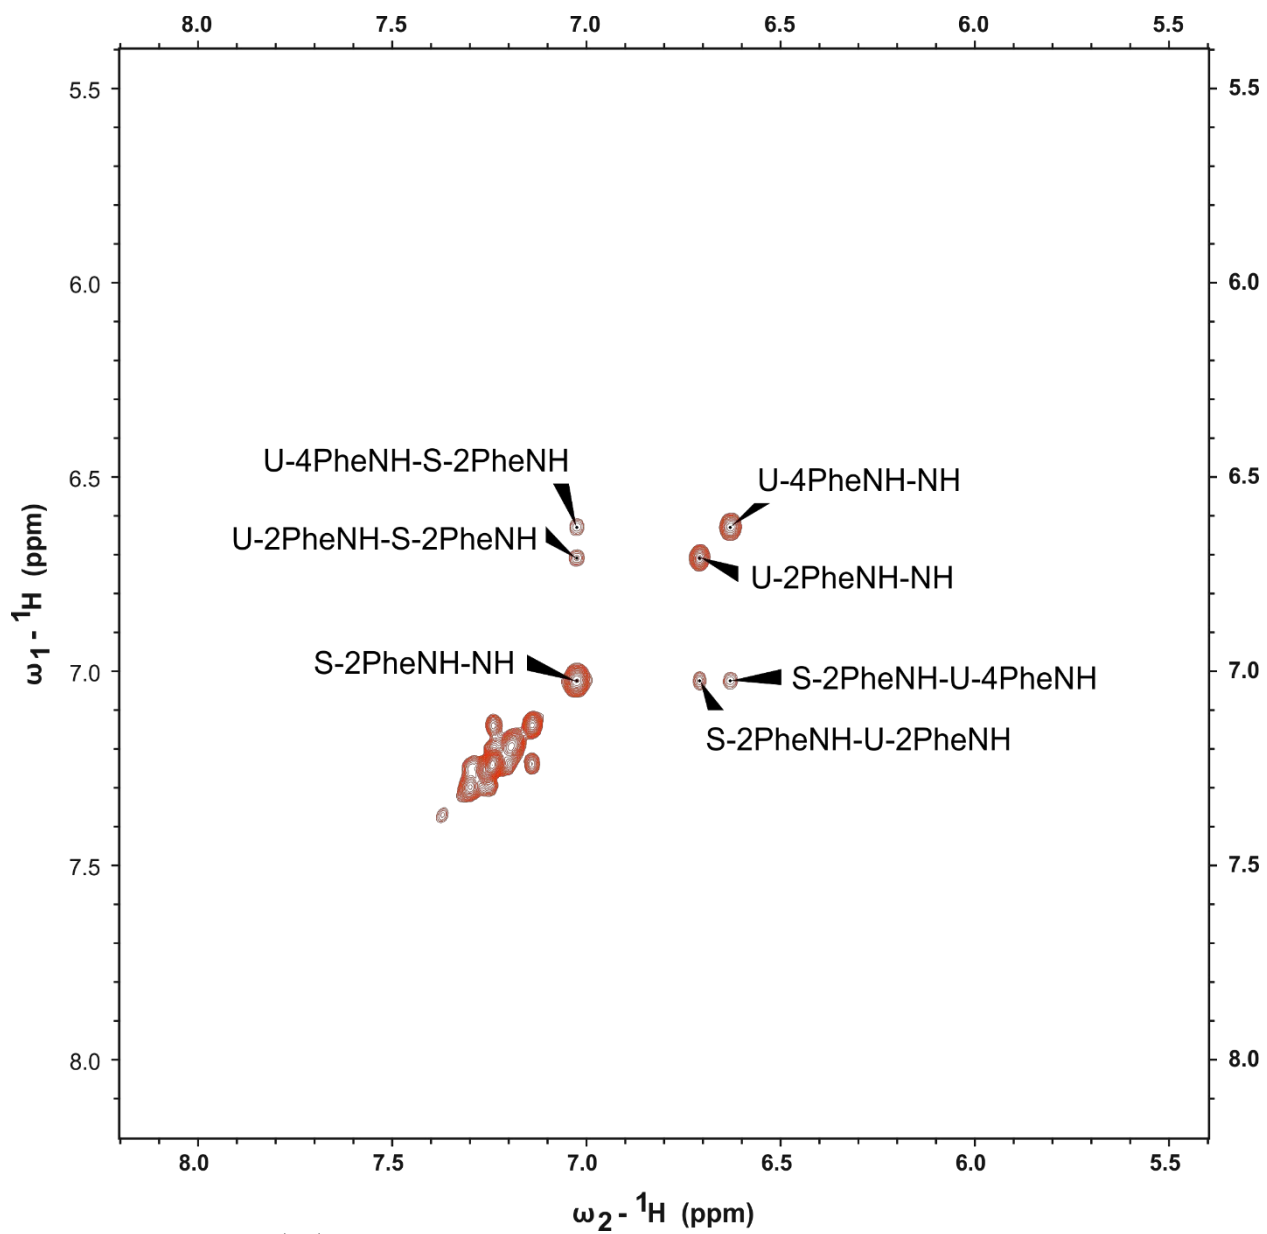

**Figure S13.** NMR EXSY  ${}^1\text{H}$ - ${}^1\text{H}$  with mixing 50 ms spectrum of cPFPF-A in  $\text{CD}_3\text{CN}$  ACN (Homochiral).

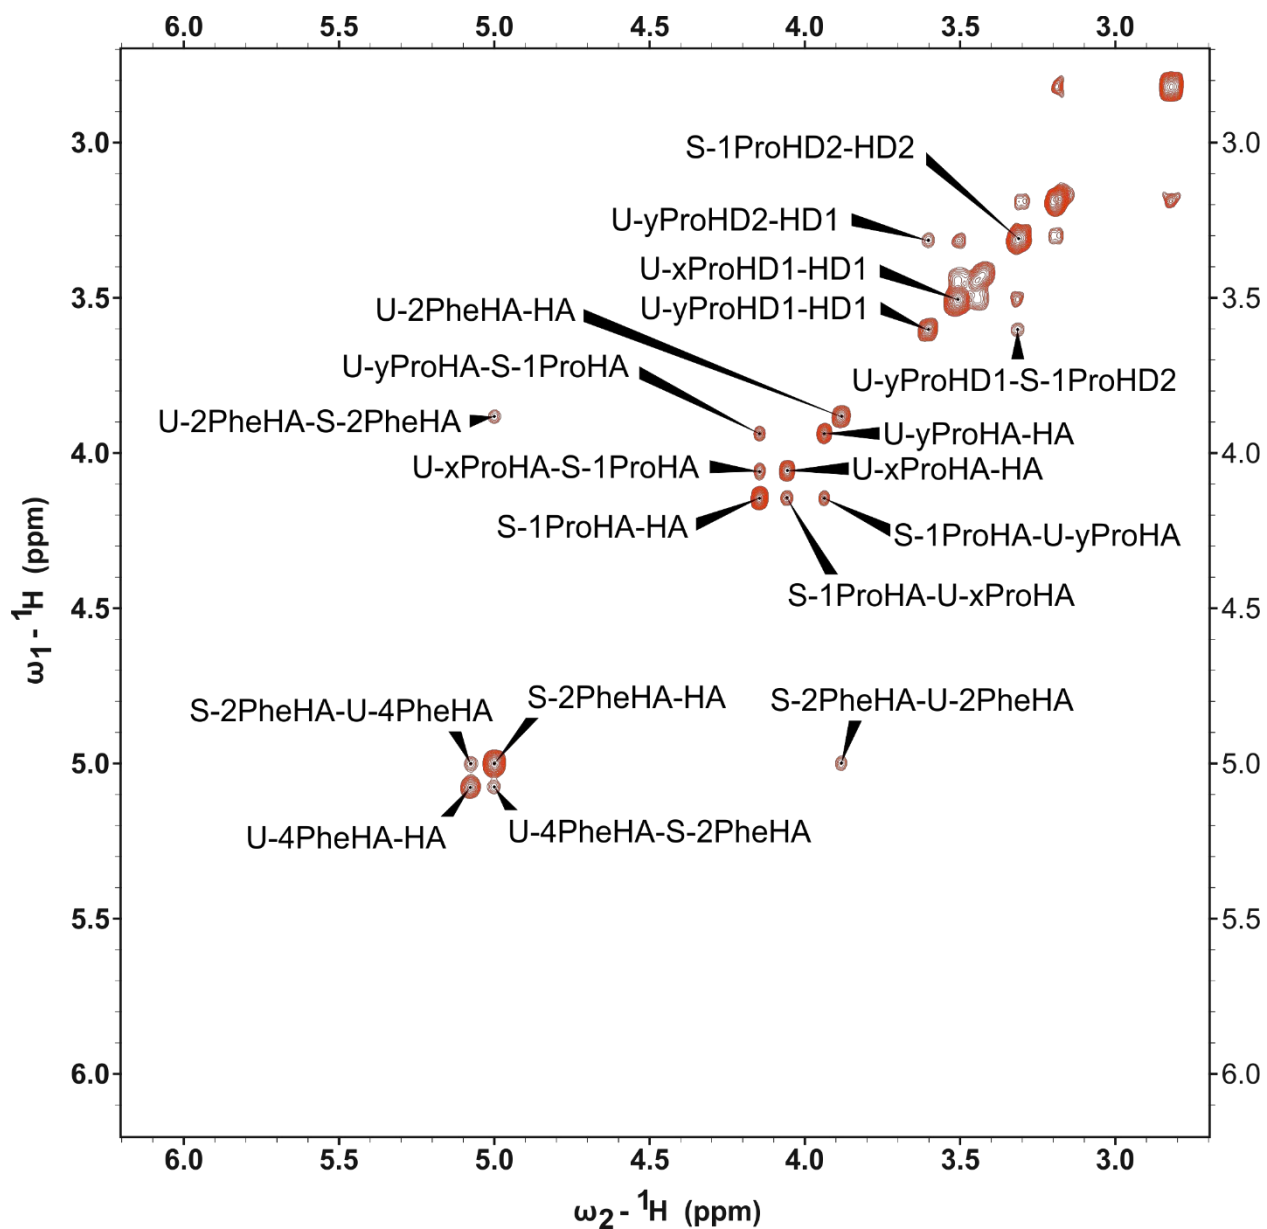

**Figure S14.** NMR EXSY  $^1\text{H}$ - $^1\text{H}$  mix with mixing 50ms spectrum of cPFPF-A in  $\text{CD}_3\text{CN}$  (Homochiral).

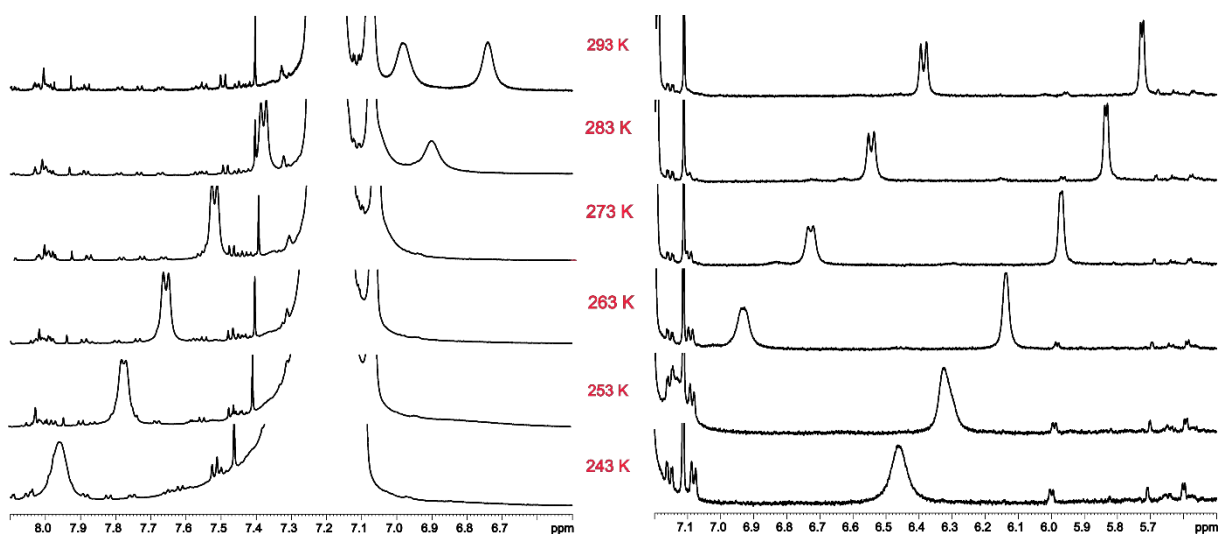

**Figure S15.** 600 MHz  $^1\text{H}$  NMR spectra of N-H region of sample A (left) and sample B (right) dissolved in chloroform-d. The spectra were recorded between 243 and 293 K with 10 K increment.



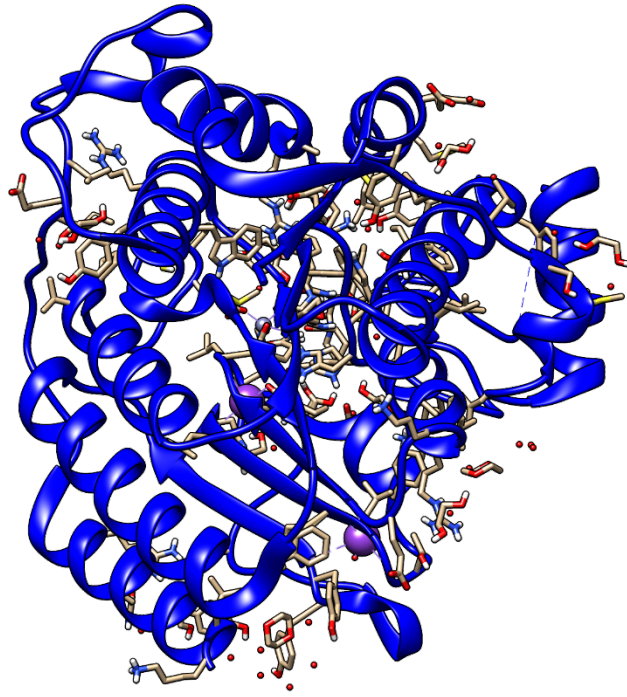

**Figure S16.** Crystal structure of histone deacetylase 8 in complex with trapoxin A.
